1 **Pervasive selection pressure in wild and domestic pigs**

2 J. Leno-Colorado<sup>1#</sup>, S. Guirao-Rico<sup>2#</sup>, M. Pérez-Enciso<sup>134</sup>, S. E. Ramos-Onsins<sup>1\*</sup>

3 <sup>1</sup> Centre for Research in Agricultural Genomics (CRAG) Consortium CSIC-IRTA-UAB-UB, Bellaterra,  
4 Spain.

5 <sup>2</sup> Departament de Genètica, Microbiologia i Estadística & Institut de Recerca de la Biodiversitat (IRBio),  
6 Universitat de Barcelona, Barcelona, Spain.

7 <sup>3</sup> Universitat Autònoma de Barcelona, Department of Animal Science, Bellaterra, Spain.

8 <sup>4</sup> Institut Català de Recerca i Estudis Avançats (ICREA), Barcelona, Spain.

9

10 #Equal contribution

11 \*Corresponding author: [sebastian.ramos@cragenomica.es](mailto:sebastian.ramos@cragenomica.es)

12

13

## ABSTRACT

14 Animal domestication typically affected numerous polygenic quantitative traits, such as behaviour,  
15 development and reproduction. However, uncovering the genetic basis of quantitative trait variation is  
16 challenging, since it is probably caused by small allele-frequency changes. To date, only a few causative  
17 mutations related to domestication processes have been reported, strengthening the hypothesis that small  
18 effect variants have a prominent role. So far, the studies on domestication have been limited to the detection  
19 of the global effect of domestication on deleterious mutations and on strong beneficial variants, ignoring  
20 the importance of variants with small selective effects. In addition, very often, the study of the effects of  
21 selection are conducted on genome sequences that contain a non-negligible fraction of missing data,  
22 especially in non-model organisms. Hence, appropriate methods to account for these positions are needed.  
23 To overcome these difficulties, here we propose to estimate the proportion of beneficial variants using the  
24 asymptotic MacDonald-Kreitman (MK) method based on estimates of variability that summarizes the site  
25 frequency spectrum (SFS) while accounting for missing data and use them to perform an Approximate  
26 Bayesian Computation (ABC) analysis to infer the Distribution of Fitness Effects (DFE) of each population.  
27 We applied this approach to 46 genome sequences of pigs from three different populations, one wild and  
28 two domestics, with very different demographic histories and selective pressures. The obtained results  
29 showed that domestic and wild pig populations do not differ in nonsynonymous fixed mutations. Therefore,  
30 differences in  $\alpha$  estimation among breeds are determined by their polymorphisms. The comparison of  $\alpha$   
31 for total and exclusive mutations suggests that the different domestic populations have suffered recent  
32 divergent changes in their functional versus neutral polymorphisms ratio, while the wild population is  
33 compatible with  $\alpha=0$ . Besides, the DFE inferred with ABC indicates that both wild and domestic pigs  
34 display a large number of deleterious mutations at low frequency and a high number of neutral and/or  
35 nearly-neutral mutations that may have a significant effect on the evolution of domestic and wild  
36 populations. In addition, models not considering beneficial mutations have higher posterior probabilities,  
37 suggesting that beneficial mutations are difficult to detect or are scarce. Indeed, for all three populations,  
38 the median proportion of the strong favourable mutations are very low ( $\leq 0.1\%$ ) in those models that  
39 includes positive selection, with the average values of weak beneficial mutations around 0.6% for wild boar  
40 and 0.8-1.0% for the domestic pigs. Lastly, the analysis based on exclusive mutations showed that recent  
41 demographic changes may have severely affected the fitness of populations, especially that of the local  
42 Iberian breed.

43

44 **Keywords:** Domestication, Distribution of fitness effects, Proportion of beneficial mutations,  
45 Approximate Bayesian calculation, Polygenic selection, Population genomics

## 46 INTRODUCTION

47 Domestic animal histories are evolutionary experiments that have often lasted for millennia  
48 resulting in dramatic phenotypic changes to suit human needs. In addition, domestic species can  
49 be structured into subpopulations (breeds) that are partly or completely genetically isolated and  
50 can display a wide catalogue of specific phenotypes. Therefore, they offer a very valuable material  
51 of utmost interest to study the interplay between demography and accelerated adaptation.  
52 However, as their demographic history can be quite complex, many events remain unknown or  
53 poorly documented nowadays.

54 The pig (*Sus scrofa*) is a particularly interesting species because of its domestication history and  
55 its relatively well-annotated genome. *S. scrofa* originated in Southeast Asia ~1-4 MYA and spread  
56 throughout Eurasia ~0.2-1.2 MYA, colonizing all climates except the driest (Frantz et al. 2013,  
57 Zhang et al. 2021). Subsequently, the pig was domesticated from local wild boars (WB)  
58 independently in both Asia and Europe ~9,000 years ago. To complicate the story, modern  
59 European domestic pig breeds were crossed with Asian domestic pigs during the late 17th century  
60 and onwards. In breeds such as Large White (LW), approximately 30% of the genome is estimated  
61 to be of Asian origin (Bosse, Megens, Madsen, et al. 2014). Nevertheless, some local European  
62 breeds, such as the Iberian breed (IB), were spared genetic contact with Asian pigs and no evidence  
63 of genetic introgression has been found in this breed (Alves et al. 2003, Esteve-Codina et al. 2013).  
64 Moreover, domestic breeds have different recent demographic histories. For instance, the IB breed  
65 suffered a dramatic reduction of its effective population size during the last century (Alves et al.  
66 2006), whereas many commercial breeds such as Duroc or LW have been introgressed with Asian  
67 pigs (Bosse, Megens, Frantz, et al. 2014).

68 Differences in the effective population size, demographic histories and artificial selective pressures  
69 between pig breed or populations could result in differences among their evolutionary rates. In  
70 addition to possible differences in the evolutionary rates between populations, there may be  
71 differences in the evolutionary rate between genes within genomes. For instance, it is known that  
72 the strength of the selection is affected by the position of the genes in the networks in which they  
73 participate. Genes that are more central in a network and are more connected with other genes are  
74 more evolutionarily constrained, while peripheral genes are more prone to be under adaptive  
75 selection (Fraser et al. 2002; Hahn and Kern 2005; Montanucci et al. 2011; Alvarez-Ponce and

76 Fares 2012). Furthermore, it has been observed that the evolutionary rate, within a metabolic  
77 pathway, increases as we move downstream, possibly because upstream genes are more  
78 pleiotropic, since they are involved in more functions and hence, these genes are probably more  
79 conserved (Rausher, Miller, and Tiffin 1999; Riley, Jin, and Gibson 2003; Livingstone and  
80 Anderson 2009; Ramsay, Rieseberg, and Ritland 2009).

81 So far, the nature of the underlying genetic changes caused by domestication and ensuing artificial  
82 breeding is still under debate. While the most prevalent view is that regulatory changes have been  
83 targeted (Anderson 2013), several other studies underline the influence of protein coding changes  
84 (Rubin et al. 2012). Some authors have reported an increase in the rate of deleterious mutations in  
85 domestic pigs compared to their wild counterparts (Cruz, Vilà, and Webster 2008; Renaut and  
86 Rieseberg 2015; Pérez-Enciso et al. 2017; Leno-Colorado et al. 2017). Others, as in Makino et al.  
87 (2018) detected a general pattern of reduction of variability in domestic populations in relation to  
88 their wild counterpart, and a higher nonsynonymous/synonymous ratio across the frequency  
89 spectrum. These patterns were compatible with the effect of strong bottlenecks in domestic  
90 populations and the higher accumulation of deleterious mutations. Interestingly, the same authors  
91 observed the opposite trend in pigs (e.g., higher variability levels in domestic pigs compared to  
92 their wild counterpart). Moreover, most of these previous studies have focused on genes of major  
93 effect with clear signals of selective sweeps. In those studies, the hallmarks of positive selection  
94 were detected as valleys of reduced variation and/or population differentiation that spans relatively  
95 large regions (e.g., Amaral et al. 2011, Rubin et al. 2012, Frantz et al. 2013, Wilkinson et al. 2013),  
96 but also by the presence of haplotype structure and homozygosity blocks (e.g., Fang et al. 2011,  
97 Bosse et al. 2012, Li et al. 2013). Some of these studies have detected recent breed specific signals  
98 of selection attributed to the domestication process (Li et al. 2014, Kim et al. 2015). Nevertheless,  
99 the signals were too scarce to explain the whole picture of the domestication process. Other studies  
100 have tried to elucidate the effect that domestication has at the genomic scale and on the fitness of  
101 individuals of domestic populations (e.g., Cruz et al. 2008, MacEachern et al. 2009, Kono et al.  
102 2016, Perez-Enciso et al. 2016, Makino et al. 2018, Chen et al. 2018, Orlando and Librado 2019).  
103 For instance, an excess of deleterious variants has been observed in a number of domestic animal  
104 and plants (e.g., contrasting nonsynonymous versus synonymous polymorphism ratios, Chen et al.  
105 2018, using the MacDonald framework, MacEachern et al. 2009, contrasting the ancestors with  
106 ancient DNA, Orlando and Librado 2019, combining the frequency of polymorphisms with

107 functional effects and divergence, Kono et al. 2016, Makino et al. 2018). Kono et al. (2016) and  
108 Perez-Enciso et al. (2016) found an excess of deleterious variants affecting phenotypes of interest,  
109 suggesting, as we previously mention above, that protein sequence may have a stronger influence  
110 than regulatory changes in the domestication process. Kono et al. (2016) also showed that null  
111 alleles are uncommon in domestic animal species (also reviewed by Anderson 2013), suggesting  
112 that phenotypic changes involved in domestication are produced by the accumulation of  
113 consecutive mutations that modify the gene functions under selection. Finally, the possible  
114 presence of beneficial mutations during the domestication process has also been reported (Perez-  
115 Enciso 2016).

116  
117 Here, we are interested in determining the proportion and the selective effects of protein-coding  
118 variants in wild and domestic pig genomes to understand their role in the domestication process.  
119 Particularly, we aimed to test the role of both new and extant mutations in the domestication  
120 process and whether the phenotypes associated with domestic breeds are the product of a large  
121 number of variants with weak selective effects, as suggested by previous results. To achieve this,  
122 we have investigated the differential effects of selection on coding sequences at the different  
123 molecular scales (gene, metabolic pathway and whole-genome) in two domestic and one wild pig  
124 population using the McDonald-Kreitman framework (McDonald and Kreitman 1991, Eyre-  
125 Walker 2006, Fay 2011). We also have performed forward exploratory simulations and inferred  
126 the distribution of fitness effects (DFE) while taking into account the effect of different  
127 demographic scenarios. Interestingly, the analysis was performed using variability estimators that  
128 allow including positions with missing data (Ferretti, Raineri, and Ramos-Onsins 2012).

129 Our results support the hypothesis that changes in allele frequencies in coding variants with weak  
130 positive selective effect have been relevant for pig domestication, as evidenced by a relatively high  
131 number of nonsynonymous variants segregating at medium and high frequencies and by the  
132 obtained estimates of the DFE in domestic pig populations.

133

134

## 135 MATERIALS AND METHODS

### 136 Biological samples

137 We analyzed a sample of 46 pig (*Sus scrofa*) genomes (Table S1). These pigs correspond to  
138 European wild boars (WB, n = 20) and domestic pigs, which are represented by the Iberian  
139 Guadyerbas (IB, n = 6) and Large White (LW, n = 20) breeds. The two domestic breeds were  
140 selected because they have very different interesting features: IB is a local breed that has been  
141 under weak artificial selection intensity and with no documented evidence of Asian introgression.  
142 LW, in contrast, is a commercial breed undergoing strong artificial selection with a deliberate  
143 admixture with Asian pigs (Bosse, Megens, Madsen, et al. 2014; Groenen 2016). To analyze the  
144 divergence between the different breeds, we built the consensus ancestral reference sequence  
145 obtained from combining the genomic information from several *Sus* species (*S. barbatus*, *S.*  
146 *cebifrons*, *S. verrucosus*, *S. celebensis*, approximately 4.2 MYA of divergence) and the African  
147 warthog (*Phacochoerus africanus*, around ~10 MYA of divergence) and used as an outgroup, as  
148 in Bianco et al. (2015). All sequences (see reference numbers at Table S1) are available in public  
149 databases: those generated in several previous works (Rubin et al. 2012; Ramírez *et al.* 2014;  
150 Bianco *et al.* 2015; Frantz et al. 2015; Moon *et al.* 2015, Esteve-Codina *et al.* 2013, Leno *et al.*  
151 2017) and those generated in this work (WBES0231, WBES0252, WBES0288, WBES0291 and  
152 WBES0297, see Table S1). They can be downloaded from the short read archive (SRA,  
153 <http://www.ncbi.nlm.nih.gov/sra>, see accession numbers in Table S1).

154

### 155 Mapping and genotyping analysis

156 For each pig genome, raw reads were mapped against the reference genome assembly  
157 (Sscrofa10.2, Groenen et al. 2012) using *BWA mem* option (H. Li and Durbin 2009). PCR  
158 duplicates were removed using *SAMtools rmdup* v. 0.1.19 (H. Li et al. 2009) and mapped reads  
159 were realigned around indels with the *GATK IndelRealigner* tool (McKenna et al. 2010). Genotype  
160 calling was performed with *SAMtools mpileup* and *bcftools call* v. 1.3.0 (H. Li et al. 2009) for each  
161 individual separately. We set a minimum (5x) and a maximum depth (twice the average sample's  
162 depth plus one) to call a SNP. Base quality was set to 20 ( $P$ -value=1e-2). Homozygous blocks  
163 (regions of contiguous positions with the same nucleotide as the reference genome) were also  
164 called, following the same criteria as with the SNPs (i.e., minimum and maximum coverage and

165 base quality) and using *samtools depth* utility, *BEDtools* (Quinlan 2014) and custom scripts  
166 (available at <https://github.com/miguelperezenciso/NGSpipeline>, Pérez-Enciso *et al.*, 2017). This  
167 resulted in a *gVCF* file per individual with the information about variant calls and non-varying  
168 positions. Next, each *gVCF* file was converted into a fasta file and all fasta files were subsequently  
169 merged to obtain a multividual *gVCF* file (Pérez-Enciso *et al.* 2017).

170

## 171 **Analysis of the population structure of the samples**

172 A principal component analysis (PCA) was performed using the total number of SNPs to explore  
173 the population structure. First, genotypes were converted to alternative allele frequency, being 0  
174 for the homozygous reference genotype (0/0), 0.5 for the heterozygous genotype (0/1) and 1 for  
175 the homozygous alternative genotype (1/1). For cases of missing genotype (./.), these were  
176 replaced by the average SNP frequency across all individuals. We used the function *tcrossprod()*  
177 from R v. 3.3.1 (2016) to obtain the matrix of covariates from the matrix of frequencies. Finally,  
178 we obtained the principal components from the Eigen-value decomposition with the R function  
179 *eigen()*. The software ADMIXTURE (Alexander *et al.* 2009) was also applied to analyze the  
180 population structure. The more suitable K was estimated using cross-validation procedure  
181 (Alexander *et al.* 2009) and the Evanno's method (Evanno *et al.* 2005).

182

## 183 **Estimation of codon bias**

184 We have used the single reference sequence of *S. scrofa* to estimate the codon bias at gene and  
185 genome level, assuming that polymorphic variants are not going to strongly modify the proportion  
186 of codons at this species. We have estimated gene and genomic codon usage with the Major Codon  
187 Usage statistic (MCU, the frequency of major codons among all codons in a sequence) and the  
188 Effective number of codons ( $N_{cw}$ ), using the python script following Fuglsang (2006). High values  
189 of MCU indicate a strong bias in codon usage, while low values suggest small bias. Instead, high  
190 values of  $N_{cw}$  indicate low codon bias because many codons are used. We have also calculated the  
191 correlation between MCU and  $\alpha$  estimates (see below), considering all annotated coding regions  
192 and only coding regions having  $\alpha$  values larger than zero.

193

## 194 **Estimation of levels and patterns of variability**

195 Genetic diversity and divergence per pig population were estimated using *mstatspop* software  
196 (Nevado, Ramos-Onsins, and Perez-Enciso 2014; Bianco et al. 2015; Guirao-Rico et al. 2018,  
197 available from the authors, <https://github.com/cragenomica/mstatspop>). The *multi-VCF* file was  
198 converted into a *tfasta* (transposed *fasta*) file and *mstatspop* was run on i) the whole genome, ii)  
199 windows of 5-Mb size, and iii) gene coding regions. Note that, given the ubiquitous presence of  
200 missing data, the SFS with highest sample size that contained more coding SNPs, retained only  
201 around 20-25% of total coding variants. As the aim of this work is to detect the presence of (weak)  
202 beneficial selective effects and as not to lose power or bias the results of the analysis, we preferred  
203 to use an alternative method that consider the whole set of SNPs. We used four different estimators  
204 of nucleotide variability that takes into account missing data (Ferretti, Raineri, and Ramos-Onsins  
205 2012): Watterson (Watterson 1975), Tajima (Tajima 1983), Fu&Li (Fu and Li 1993) and  
206 Fay&Wu's estimators (Fay and Wu 2000). The variability was estimated for total, shared and  
207 exclusive variants, being shared and exclusive nucleotide variability counted regarding to the total  
208 positions (i.e., total = shared + exclusive).

209

## 210 **Filtering for artefactual effects**

211 A preliminary analysis of the variability showed a moderate negative correlation ( $\sim 0.3$ ) between  
212 the levels of variability and divergence and the proportion of missing data for each gene. To  
213 eliminate this artefactual correlation, we plotted the estimators of variability and divergence versus  
214 the ratio of missing data and eliminated those genes that showed a ratio of missing data greater  
215 than 0.3. Since this filtering was not enough to completely remove the bias, we also removed genes  
216 with extreme values of variability and divergence (higher than 99% quantile of the total genes).  
217 The remaining  $\sim 13,500$  genes (70% of the total annotated genes) showed a low or null correlation  
218 with missing data and were used in the present analysis (Table S2).

219

## 220 **Estimation of the proportion of adaptive variants**

221 Under the neutral model, the majority of polymorphisms segregating in a population are neutral  
222 and only a small number of selected variants segregates for a short time on their way to loss or



223 fixation. Hence, most of the positive selected variants are only observed as fixed variants. In  
224 addition, functional positions (nonsynonymous positions) are constrained compared to non-  
225 functional positions (synonymous positions), and hence, their evolutionary ratios are smaller. In  
226 the neutral scenario, polymorphism and divergence (excluding the adaptive fixed variants) are  
227 proportional to the mutation rate and to the constriction factor in the case of nonsynonymous  
228 positions (McDonald and Kreitman 1991, Eyre-Walker 2006, Fay 2011). That is:

$$229 \quad \frac{\theta_n}{\theta_s} = \frac{(1 - \alpha)K_n}{K_s},$$

230 *(Equation 1)*

231 where  $\theta_n$  is the nonsynonymous variability,  $\theta_s$  is the synonymous variability,  $K_n$  is the  
232 nonsynonymous divergence,  $K_s$  is the synonymous divergence and  $\alpha$  is the proportion of adaptive  
233 variants that have been fixed. To estimate the proportion of nonsynonymous substitutions that are  
234 adaptive ( $\alpha$ ) the previous expression is reordered (e. g., Eyre-Walker 2006):

$$235 \quad \alpha = 1 - \frac{K_s \theta_n}{K_n \theta_s}$$

236 *(Equation 2)*

237 A higher ratio of nonsynonymous to synonymous divergence versus polymorphisms suggests that  
238 positive selection has fixed adaptive variants ( $\alpha > 0$ ) and the opposite case ( $\alpha < 0$ ) suggests the  
239 presence of deleterious mutations segregating in the population.

240 If we consider that weak deleterious mutations are segregating in the population, we expect that  
241 their relative proportion will be higher at lower frequency variants and low or zero for fixed  
242 deleterious mutations. Following the same notation as in equation 2:

$$243 \quad \frac{\theta_{in}(1 - \beta_i)}{\theta_{is}} = \frac{(1 - \alpha - \beta_d)K_n}{K_s},$$

244 *(Equation 3)*

245 where  $i$  refers to the frequency at which the calculation of variability is estimated,  $\beta_i$  is the  
246 proportion of weakly deleterious polymorphic mutations at frequency  $i$ ,  $\beta_d$  is the proportion of  
247 weakly deleterious fixed mutations.  $\beta_d < \beta_i$  was assumed at any frequency. Then, solving for the  
248 proportion of fixed adaptive variants ( $\alpha$ ):

249 
$$\alpha = 1 - \beta_d - (1 - \beta_i) \frac{K_s \theta_{in}}{K_n \theta_{is}}$$

250 *(Equation 4)*

251 We see that in case of calculating  $\alpha$  without considering the effects of deleterious mutations, this  
252 would be underestimated depending on the frequency at which the estimates of variability are  
253 calculated. If we assume that the deleterious variants would hardly be fixed, a good estimator of  $\alpha$   
254 using equation 2 would be the one that estimates variability based on high frequencies, as it would  
255 hardly contain deleterious mutations. This is in agreement with the asymptotic arguments used in  
256 Messer and Petrov (2013) and implemented in Haller and Messer (2017).

257  
258 Similarly, if we also consider that weak positively selected variants are segregating in the  
259 population, we expect that their relative proportion, compared to neutral ones, is higher at higher  
260 frequencies:

261 
$$\frac{\theta_{in}(1 - \beta_i - \gamma_i)}{\theta_{is}} = \frac{(1 - \alpha - \beta_d - \gamma_d)K_n}{K_s},$$

262 *(Equation 5)*

263 where  $\gamma_i$  is the proportion of weakly advantageous polymorphic mutations at frequency  $i$ , and  $\gamma_d$  is  
264 the proportion of weakly advantageous fixed mutations. Again, solving for the proportion of fixed  
265 adaptive variants ( $\alpha + \gamma_d$ ):

266 
$$\alpha + \gamma_d = 1 - \beta_d - (1 - \beta_i - \gamma_i) \frac{K_s \theta_{in}}{K_n \theta_{is}}$$

267 *(Equation 6)*

268 In this case, the presence of adaptive variants segregating in the population would affect the  
269 estimates of variability based on high frequency variants when using equation 2, which would  
270 result in an underestimation of the proportion of fixed adaptive variants ( $\alpha$ ). Note that adaptive  
271 variants stabilized at intermediate frequencies, which can be an important source of adaptation  
272 considering the infinitesimal model, are not considered in this approach.

273

274 If we focus on the effects of polymorphic weakly selected mutations, equation 5 suggests that the  
275 ratio of nonsynonymous to synonymous polymorphisms would increase due to mutations having  
276 both positive and negative effects. It is expected that the number of mutations with negative  
277 selection coefficients would rapidly decrease as we move to intermediate and high frequencies,  
278 while the opposite trend is expected for mutations with positive selection coefficients. Hence,  
279 higher ratios of nonsynonymous to synonymous polymorphisms at higher frequencies may be  
280 explained by the presence of advantageous mutations segregating in the population.

281  
282 Furthermore, in cases where two populations are from the same species and there are no fixed  
283 mutations between them (e.g., they have equal divergence ratios versus the outgroup), we can  
284 estimate the possible differential effect of the selection (positive and negative together) at any  
285 frequency between populations from the ratios of synonymous to nonsynonymous polymorphisms  
286 of the two populations ( $R_{\beta\gamma_i}$ ):

$$287 \quad \frac{\theta_{in1}(1 - \beta_{i1} - \gamma_{i1})}{\theta_{is1}} = \frac{\theta_{in2}(1 - \beta_{i2} - \gamma_{i2})}{\theta_{is2}}$$

288 and

$$289 \quad \frac{(1 - \beta_{i1} - \gamma_{i1})}{(1 - \beta_{i2} - \gamma_{i2})} = \frac{\theta_{is1}\theta_{in2}}{\theta_{in1}\theta_{is2}} = R_{\beta\gamma_i}$$

290 *(Equation 7)*

291 In addition, a comparison of the  $R_{\beta\gamma_i}$  values calculated using different variability estimators  
292 (hereafter  $R_{\beta\gamma_i}$  pattern) can be used to inform about the effects of selection. For example, values  
293 over 1 indicate that the population 2 has a higher ratio of nonsynonymous to synonymous  
294 polymorphisms compared to population 1, either produced by an accumulation of deleterious or  
295 of beneficial polymorphisms. Importantly, different demographic effects (e.g., bottlenecks)  
296 together with the presence of mutations with small selective effects may also disturb the ratios of  
297 variability and hence must be considered when interpreting the results. We include a couple of  
298 possible scenarios that can account for possible patterns: (i) after split of two the two populations,  
299 both populations have the same population size, but population 1 is affected by the action of  
300 positive selection on a quantitative trait (polygenic effect), which causes an increase in the  
301 frequencies of some of its variants without getting fixed. Under this scenario, we expect a  $R_{\beta\gamma} >$

302 1 when this is calculated based on high frequencies. (ii) after split of two the two populations, the  
303 population 2 remains equal population size as before the split and the population 1 suffers a  
304 reduction in its effective population size, which causes that the slightly deleterious mutations  
305 become effectively neutral. Then,  $R_{\beta\gamma}$  is expected to be  $> 1$  when it is calculated based on low  
306 frequency variants.

307 The effect of linkage disequilibrium between selective (deleterious or adaptive) and neutral  
308 variants should not overly affect the expected estimate of the proportion of adaptive variants, as it  
309 would affect both synonymous and nonsynonymous positions in similar proportion. On the  
310 contrary, the interaction of variants with opposite selective effects would possibly reduce the effect  
311 of selection and would have a significant consequence on the estimation of adaptive fixed variants  
312 (Hill and Robertson 1966; Booker and Keightley 2018).

313

#### 314 **Bootstrap analysis**

315 Nonparametric bootstrap analysis was performed to estimate the null distribution of the  $\alpha$  statistic  
316 for each variability estimator and pig population. In each case, synonymous and nonsynonymous  
317 coding positions were randomly chosen with replacement and the  $\alpha$  statistic was calculated as in  
318 equation 1. This process was repeated 100 times.

319

#### 320 **Simulations**

321 We carried out forward simulations using the software *SLiM* (Haller and Messer 2017) in order to  
322 explore the interaction between the different selective effects and demographic factors affecting  
323 the evolution of pig populations during domestication. We explored the expected values of  
324 nucleotide diversity, divergence,  $\alpha$  and  $R_{\beta\gamma}$  statistics under 63 different scenarios. For each  
325 scenario, we simulated three populations corresponding to wild, domestic and an outgroup species.  
326 We first simulated nine different scenarios that were classified into three main groups: i) standard  
327 neutral model (SNM); ii) a model with negative selection (NS) and iii) a model with positive  
328 selection (PS). For the models with selection, we let that selection operate from the ancestral  
329 species to the present time. Each group of scenarios (SNM, NS and PS) was simulated with a  
330 constant effective population size for the three populations or with a reduction or an expansion of

331 the effective population size in the branch leading to domestic pigs. A second group of simulations  
332 was performed under more complex scenarios. In those simulations, we incorporated the combined  
333 effect of negative and positive selective effects (using gamma and exponential distributions for the  
334 selective coefficients, respectively) plus demographic effects such as expansion and reduction of  
335 the effective population size in the domestic simulated populations and with or without migration  
336 from the wild into the domestic populations (in total 54 complex simulated scenarios). Figure S1  
337 shows a general scheme for the simulated populations and Tables S3A-B show the parameter  
338 values used in these simulations. The obtained results were analyzed using *mstatspop* software  
339 (see above).

340

### 341 **Approximate Bayesian computation (ABC) analysis**

342 We used the ratio of the estimates of nucleotide variability ( $\theta_n/\theta_s$ ) per nucleotide for  
343 nonsynonymous versus synonymous positions (Fu&Li, Watterson, Tajima and Fay&Wu) and of  
344 divergence ( $Kn/Ks$ ) as statistics to infer the distribution of fitness effects (DFE) in coding regions.  
345 We compared four evolutionary models that differ in the shape of the DFE using the algorithm  
346 proposed by Tataru et al. (2017), which are the following: (i) model A: a model with a deleterious  
347 gamma DFE with the mean and the shape of the gamma distribution as model parameters, (ii)  
348 model C: a model with a gamma distribution of deleterious variants with two parameters (shape  
349 and mean) and an exponential distribution of beneficial variants with one parameter (mean), and  
350 the additional parameter of the proportion of beneficial versus deleterious variants, (iii) model DN:  
351 a model with a discrete distribution of a priori values of negative selective coefficients with the  
352 proportion of negatively selected mutations for each of the negative selective coefficients as  
353 parameters. and (iii) model D: a model with a discrete distribution of a priori values of possible  
354 selective coefficients (positive and negative) with the proportion of positively and negatively  
355 selected mutations for each selected coefficients as parameters. Some of the additional parameters,  
356 such as demographic or linkage effects, were considered as nuisances. Nuisance parameters mimic  
357 the demographic effects and other parameters such as linkage effect by using the difference  
358 between the observations for the neutral dataset (i.e., synonymous sites) and the expected under  
359 the neutral model. Others, such as errors in the polarity of unfolded mutations, were fixed.

360 Table S4 shows the parameters of each model and the prior distributions used in the analysis. We  
361 used *polyDFEv2* (Tataru et al 2019) to obtain the expected unfolded site-frequency spectrum  
362 (SFS). The code of *polyDFEv2* was slightly modified in order to print the SFS and the parameters  
363 for a large number of conditions, which are needed to perform the ABC analysis using summary  
364 statistics. For each model, one million iterations were run using different parameter conditions and  
365 the resulting SFS for each condition were kept to later calculate the ratios of variability, divergence  
366 and the  $\alpha$  statistic. The ABC analysis was performed using the R library *abc* (Csillery et al. 2012).  
367 We performed a cross validation analysis to evaluate the ability of the approach to distinguish  
368 between models using the *cv4postpr()* function, as suggested in the *abc* library documentation.  
369 The confusion matrix indicated that these three models were quite distinguishable with a  
370 probability of true classification from model A versus C/DN/D of 0.69, from model C versus  
371 A/DN/D of 0.65, from model DN versus A/C/D of 0.83 and from model D versus A/C/DN of 0.80,  
372 using a tolerance value of 0.05 (Table S5). Posterior probabilities of each model given the observed  
373 data (i.e., the probability assigned to each model relative to the other models of the analysis), were  
374 obtained using the *postpr()* function and considering a multinomial logistic and a rejection  
375 approach. Additionally, a goodness of fit analysis, which evaluates whether the prior distribution  
376 for model parameters are realistic, was also performed. The best model was selected based on  
377 posterior probabilities. Once the best model was chosen, the ability to infer the parameters of the  
378 model was assessed using the *cv4abc()* function. Prediction errors for the parameter inference of  
379 each model are shown in Table S6 and Figure S2. The parameters of the best model were inferred  
380 with the *abc()* function using a local linear regression and a rejection approach. Posterior predictive  
381 simulations were performed using the  $\alpha$  statistic to determine whether the simulated data generated  
382 from the estimated parameter of our best model resembled the observed data (1000 replicates).  
383 Finally, the  $\alpha$  values can be simply estimated using equation 10 from Tataru et al. (2017), as the  
384 proportion of positive selective coefficients ( $s$ ) values in the case of the discrete distribution.

385

### 386 **Gene context and network topology analysis**

387 We downloaded the complete list of pathways and genes of *S. scrofa* from KEGG v.20170213  
388 (<http://www.genome.jp/kegg/>, Kanehisa et al. 2008). The list contained 471 pathways and 5,480  
389 genes. The median and mean number of genes per pathway was 26 and 43, respectively, and ranged

390 from 1 to 949. We filtered the pathways according to their size, removing pathways with less than  
391 10 and more than 150 genes in order to discard pathways that were not informative or too generic  
392 and complex. The final list contained 171 pathways and 3,449 genes.

393 To analyze the selection pressure of each gene according to its position in the pathway, we obtained  
394 different topological parameters. For that, we first downloaded the XML file of each pathway from  
395 KEGG v.20170213. These files were analyzed with the *iGraph* R package (Csardi G. and Nepusz  
396 T. 2006) to obtain the topological descriptors of each gene in each pathway. For each gene, three  
397 different measures were computed: *betweenness* (number of shortest paths going through a vertex),  
398 *in-degree* (number of in-going edges) and *out-degree* (number of out-going edges). These  
399 parameters are measures of the importance of a gene within a pathway: *betweenness* is a centrality  
400 feature, *in-degree* suggests the facility of a protein to be regulated and *out-degree* reflects the  
401 regulatory role of a protein. We tested whether negatively and positively selected genes differed  
402 in any of these statistics using a nonparametric Wilcoxon rank test, due to the extreme leptokurtic  
403 distributions involved.

404

#### 405 **Genomic context patterns**

406 We have additionally tested whether there is a significant correlation between  $\alpha$  and  
407 recombination, gene density, missing rate, %GC and CpG islands across genomes.

408

#### 409 **Testing the differences in the estimates of $\alpha$ using whole-genome data versus the mean of** 410 **gene estimates.**

411 We have studied the behaviour of the  $\alpha$  statistic when it is estimated considering a single large  
412 dataset (*i.e.*, genome) or when it is estimated using the mean of many subsets (*i.e.*, genes). To do  
413 that, we made an R script (`check_ratios_vs_meanratios.R`) in which we simulated a hypothetical  
414 number of polymorphisms and substitutions per gene, following a Poisson distribution (we  
415 considered  $\sim 10x$  more substitutions than polymorphisms,  $2x$  more nonsynonymous positions than  
416 synonymous and  $10x$  more functional constraint at nonsynonymous versus synonymous). We  
417 estimated  $\alpha$  per window and per total. The distribution of  $\alpha$  per gene can be strongly skewed to

418 negative values when the windows become smaller, thus dragging the mean to negative values as  
419 well.

420

421 All the scripts used are available at Zenodo database  
422 (<https://zenodo.org/record/6124306#.YlcVSy8RqLc>).

423

424



425 **RESULTS**

426 **Predominance of shared variants and global similar selective effects of mutations in**  
427 **genomic sequences of pig populations**

428 We found a total of 6,684,142 SNPs in autosomes, with 149,440 SNPs located in coding regions.  
429 12.5% of the SNPs in the coding regions are shared among the three populations, 32.2% are shared  
430 between at least two populations, 31.2% are exclusive to Large White (LW), 2.2% are exclusive  
431 to Iberian (IB) and 34.4% are exclusive to Wild boar (WB) (Table 1 and Table S7). The proportion  
432 of exclusive SNPs in each population is in accordance with its specific demographic history  
433 (Esteve-Codina et al. 2013, Bosse, Megens, Madsen, et al. 2014). Based on the PCA analysis and  
434 using the total number of SNPs, we found that the individuals of each breed cluster together and  
435 are well separated from other breeds (Figure S3A). The results from the ADMIXTURE analysis  
436 (Figure S3B) suggest that,  $K=2$  is the most likely number of populations, where WB and IB are  
437 considered a single population. Under a  $K=2$  scenario, only two LW and one WB individual show  
438 a significant percentage of admixture among groups. Nevertheless, for larger values of  $K$ , new  
439 groups emerge, being the IB one of these separated groups (Figure S3B). However, additional  
440 subgroups within WB and LW phenotypes appear and disappear when increasing the  $K$  value,  
441 making those subgroups apparently unreliable. Therefore, we decided to analyze separately the  
442 three breeds, LW, IB and WB, following the main patterns of population structure (Figure S3A)  
443 and the phenotypic features of the animals, which essentially separate domestic (commercial and  
444 local breed, separately) from wild animals.

445

446

447 **Table 1.** Number of synonymous and nonsynonymous SNPs according to its allelic status in each pig population. A:  
 448 Ancestral allele, F: Fixed allele, P: Polymorphic allele. IB: Iberian; LW: Large White; WB: Wild boar. SNPs that are  
 449 missing in any of the populations are not considered.

| <b>IB</b> | <b>LW</b> | <b>WB</b> | <b>Synonymous</b> | <b>Non-synonymous</b> |
|-----------|-----------|-----------|-------------------|-----------------------|
| F         | F         | F         | 20297             | 9342                  |
| P         | P         | P         | 11712             | 7597                  |
| A         | A         | F         | 0                 | 0                     |
| A         | F         | A         | 0                 | 0                     |
| F         | A         | A         | 3                 | 5                     |
| A         | A         | P         | 30314             | 20988                 |
| A         | P         | A         | 26027             | 15035                 |
| P         | A         | A         | 1833              | 1588                  |
| A         | F         | F         | 0                 | 0                     |
| F         | A         | F         | 1                 | 0                     |
| F         | F         | A         | 1                 | 0                     |
| A         | P         | P         | 10128             | 7930                  |
| P         | A         | P         | 1676              | 1254                  |
| P         | P         | A         | 700               | 363                   |
| A         | F         | P         | 11                | 1                     |
| A         | P         | F         | 0                 | 2                     |
| F         | A         | P         | 30                | 30                    |
| P         | A         | F         | 0                 | 0                     |
| F         | P         | A         | 8                 | 4                     |
| P         | F         | A         | 1                 | 1                     |
| F         | P         | P         | 4924              | 2378                  |
| P         | F         | P         | 242               | 139                   |
| P         | P         | F         | 81                | 52                    |
| F         | F         | P         | 1140              | 489                   |
| F         | P         | F         | 4911              | 2073                  |
| P         | F         | F         | 38                | 22                    |
|           |           |           | <b>114078</b>     | <b>69293</b>          |

450

451

452 For each breed, coding positions were classified as polymorphic, fixed (i.e., different allele from  
 453 the outgroup) or ancestral allele (i.e., same allele as in the outgroup), with the aim of identifying  
 454 those variants that appeared previously or posteriorly to the domestication process (Table 1).

455 Surprisingly, we found very few fixed mutations between populations, indicating that the  
456 phenotypic traits of each population are not associated with fixed coding variants. Similarly, we  
457 found very few fixed coding variants in domestic (IB or LW) versus wild (WB). There are few  
458 variants fixed in the domestic breeds that are polymorphic in the wild population, suggesting that  
459 these variants were previously present in wild breeds or, alternatively, were introgressed into WB  
460 from domestic breeds. Most of the variants that are exclusive of a single breed are polymorphic,  
461 which is in agreement with the recent origin of these variants. We found a large number of fixed  
462 variants in the IB that are polymorphic in LW and WB, likely due to a reduction of the effective  
463 population size of the IB breed. The ratio of nonsynonymous to synonymous polymorphism was  
464 always lower than one and showed similar values for the three populations regardless of the  
465 variability estimator used (Table S9). This result suggests that, on average, there are no differential  
466 effects of selection between domestic and wild populations, although this might not be the case  
467 when individual genes are considered.

468

#### 469 **Low codon bias at whole-genome scale**

470 We estimated the level of codon bias at genome scale using MCU and  $N_{cw}$  statistics to control for  
471 the possible effect of selection on synonymous positions. Non-neutral synonymous mutations can  
472 have a large impact on the inference of the proportion of beneficial selection, and on the estimation  
473 of the Distribution of Fitness Effects (DFE). Indeed, the effect of bias in codon usage causes an  
474 overestimation of the beneficial proportion of variants that become fixed by increasing the ratio of  
475 synonymous polymorphisms versus synonymous fixations (Akashi, 1995, Matsumoto et al. 2016).  
476 For this species, we observed a low and large values of MCU and  $N_{cw}$ , respectively, indicating low  
477 levels of codon bias at genome scale (mean MCU=0.485, Figure S5). However, it should be  
478 mentioned that positive selection could be acting on synonymous positions of some specific genes.  
479 We therefore have assessed whether there was a correlation between MCU and  $a$ , considering all  
480 coding regions or only coding regions showing positive  $a$  values. We observed no correlation  
481 between MCU and  $a$  values when considering only genes with positive  $a$  values (Figure S5) and  
482 slightly negative correlation when considering all genes regarding their respective  $a$  values (data  
483 not shown).

484

## 485 **Limited influence of genomic context and the network topology on selective patterns**

486 The heterogeneity in the recombination rate, the gene density, the %GC and the distribution of  
487 CpG islands across the genome can affect the local levels of variability. A previous study on the  
488 IB breed detected a strong correlation between recombination and variability, although no  
489 correlation was observed between variability and gene density or GC content (Esteve-Codina et  
490 al. 2013). However, the effect of these factors on the estimation of the proportion of adaptive  
491 nonsynonymous mutations ( $\alpha$ ) has not been previously studied. When we assess whether there is  
492 a correlation between the estimated  $\alpha$  and the above-mentioned factors, we found that there is no  
493 correlation between the estimated  $\alpha$  and recombination, gene density, %GC and CpG in any of the  
494 three breeds ( $P$ -values  $> 0.01$ ).

495  
496 Next, we investigated the effect of gene network topology on the selective patterns. It has been  
497 claimed that topology limits the ‘evolvability’ of genes and that highly connected genes are more  
498 constrained and, consequently, less likely to be targets of positive selection. We compared the  
499 network topology features (*betweenness*, *out-degree* and *in-degree*) of genes within pathways  
500 regarding the estimates of  $\alpha$ , grouping genes with positive versus negative  $\alpha$  values. We found that  
501 genes with negative  $\alpha$  values show significant large values of the *betweenness* statistic in the three  
502 pig breeds compared to genes with positive  $\alpha$  values ( $P$ -value  $< 0.01$ ; Figure S4). LW and WB  
503 showed significant values ( $P$ -values  $< 0.01$ ) of the *in-degree* statistic for genes with negative  $\alpha$   
504 values compared to genes with positive  $\alpha$  values. However, we did not observe significant  
505 differences in the *out-degree* values between genes with negative and positive  $\alpha$  values in any of  
506 the three breeds (Figure S4). These results suggest that, in the three breeds, genes that are more  
507 central in a pathway are more evolutionary constrained compared to peripheral genes. In addition,  
508 in LW and WB, the genes that are more constrained tended to have a higher number of upstream  
509 genes that regulated them, which is also in agreement with the central position of these genes in  
510 the pathway. We did not observe significant differences in *in-degree* statistic in the IB breed  
511 between genes with negative and positive  $\alpha$  values, likely because of a relaxation of functional  
512 constraints as a consequence of the reduction of its effective population size.

513

514 **Levels of nucleotide variation at protein coding regions are compatible with the history of**  
515 **the surveyed pig populations and with the presence of positive selection**

516 To assess the selective effect of domestication, we first studied the pattern of variation at  
517 synonymous and nonsynonymous positions using four estimators of variability that differentially  
518 weight the SNP frequencies (See Material and Methods). Ideally, it would be more informative to  
519 analyze the whole genome Site Frequency Spectrum (SFS). Unfortunately, the relatively high  
520 number of positions with missing data discourages their use. A possible alternative would be to  
521 obtain the SFS from a reduced number of samples, and therefore use only a partial number of SNPs  
522 for subsequent analysis. However, by using this alternative we can either lose power or introduce  
523 some sort of bias, hence, we preferred to analyze the whole set of SNPs using those estimates of  
524 variability based on different frequencies of the spectrum that account for missing data.  
525 Nevertheless, in order to clarify the patterns of the SFS for these populations, we estimated the  
526 SFS for a subset of SNPs (around 25-30% of the available coding variants, depending on the breed)  
527 for a projection of variants on 38 haploid samples in both LW, WB and on 10 haploid samples in  
528 IB (Figure S6). The SFS profile for both synonymous and nonsynonymous showed a rapid  
529 decrease in the number of variants from lower to higher frequencies. We observed a slight increase  
530 in the number of polymorphisms at the highest frequencies at both synonymous and  
531 nonsynonymous sites and no apparent signals of admixture (i.e., no sudden peaks at specific ranges  
532 of frequencies). Estimates of whole-genome variability levels per nucleotide using different  
533 estimators are shown in Figure 1 and detailed in Table S8. We have considered the synonymous  
534 positions as neutral reference since no strong bias in codon usage has been detected (Figure S5).  
535 We expect that, under the Standard Neutral Model (SNM), the values for the different estimates  
536 of variability should be similar whereas differences among them may indicate demographic and/or  
537 selective effects. We observed that i) the levels of variability are different for each estimator within  
538 breeds and ii) the levels of variability are different for the same estimator for different breeds.  
539 However, for each breed, we observed a similar ratio of nonsynonymous to synonymous  
540 polymorphisms regardless of the used estimator, suggesting that demographic effects are  
541 responsible for the differences in the levels of variability (Figure 1). The less variable population  
542 is the IB breed, which shows far fewer singletons compared to WB and LW, probably as a  
543 consequence of the known reduction of its population size. Note that in all the three populations,  
544 high-frequency variants are proportionally more abundant than those at intermediate frequencies,

545 which would be compatible with the accepted demographic history of the surveyed populations  
 546 (i.e., introgression in LW, bottleneck in IB and some population reduction and introgression in  
 547 WB) but also with the presence of pervasive positive selection in all three populations.

**A**

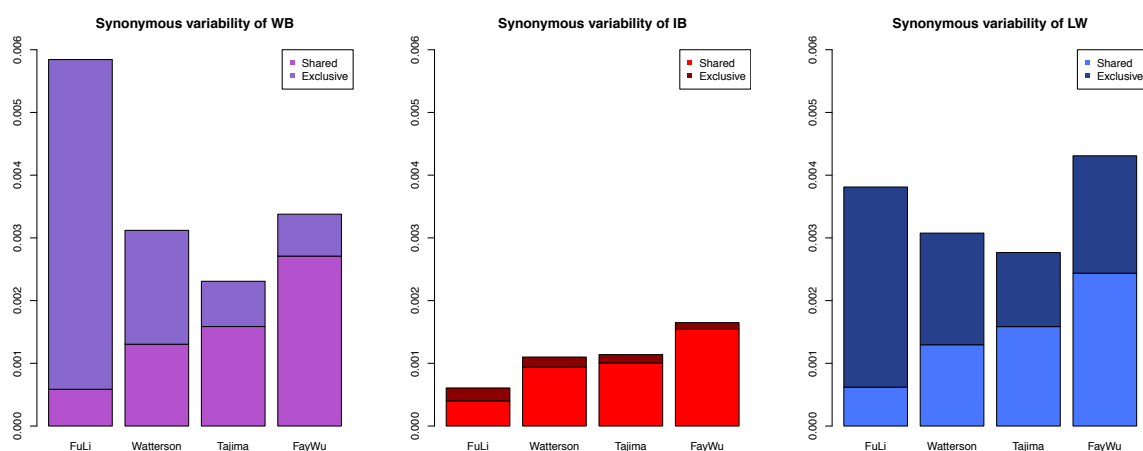

**B**

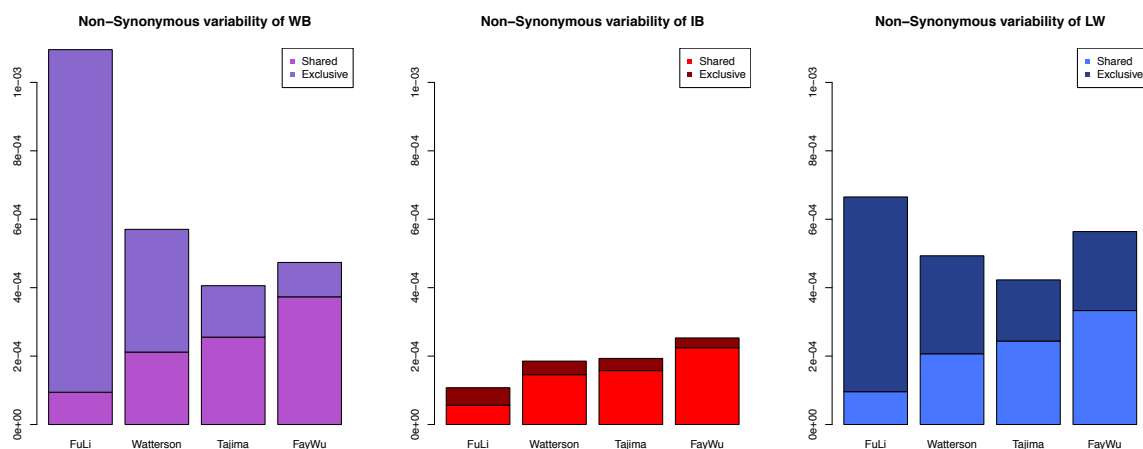

548  
 549 **Figure 1.** Estimates of the levels of variation at synonymous (A) and nonsynonymous (B) sites for each variability  
 550 estimator and pig population and where variants were classified as shared and exclusive variants. WB; Wild boar;  
 551 IB, Iberian; LW, Large White.

552

553  **$\alpha$ 's values and  $R_{\beta\gamma}$  ratios based on all SNPs might reflect a differential effect of selection**  
554 **due to domestication**

555 The differential effect of selection in the domestic and wild populations can be studied by  
556 comparing their respective  $\alpha$  values. Figure 2A and Table S9 show the genome-wide  $\alpha$  values  
557 calculated using the four variability estimators for each population. As expected, the  $\alpha$  values are  
558 negative when  $\alpha$  is calculated using the estimate of variability based on low-frequency variants  
559 ( $\alpha_{Fu\&Li}$ ), probably reflecting the relatively high proportion of deleterious versus neutral mutations  
560 that are segregating at low frequencies. We observed a similar value of  $\alpha_{Fu\&Li}$  in all populations,  
561 suggesting a similar proportion of segregating deleterious mutations, irrespective of the  
562 domestication process or other demographic events (Figure 2A). Moreover, we observed milder  
563 negative values of  $\alpha$ , or even positive for LW when  $\alpha$  is calculated based on variants at high  
564 frequencies (Figure 2A), according to expectations, which point to a progressive elimination of  
565 deleterious mutations as we move towards higher frequencies. Nevertheless, the pattern of  $\alpha$  (i.e.,  
566 the comparative  $\alpha$  value calculated using the four different variability estimators within each  
567 population) is very different in each population. WB and LW show positive or null  $\alpha$  values when  
568 it is calculated based on high frequencies (Table S9). Instead, IB show very low negative  $\alpha$  values  
569 for all estimators of variability. We found a compatible pattern when using the reduced subset of  
570 SNPs for the SFS estimation (Figure S6-A), where it can be observed that the estimates of  $\alpha$  in all  
571 three populations are very similar among them ( $\alpha \sim -0.05$ ), although their confidence intervals are  
572 quite wide.

573

574 The differences in the ratio of synonymous to nonsynonymous variability between the two  
575 different breeds is summarized by the  $R_{\beta\gamma}$  ratio (Figure 3). We observed that the largest deviations  
576 from  $R_{\beta\gamma} = 1$  are observed when the ratio was calculated based on high-frequency variants  
577 ( $\alpha_{Fay\&Wu}$ ). Although the ratio of the two populations is difficult to interpret because of their  
578 different underlying demographic histories, some trends can be observed. WB shows an excess of  
579 nonsynonymous variants segregating at intermediate frequencies (WB-IB, WB-LW), which might  
580 be explained by a past bottleneck that increased deleterious mutations at intermediate frequencies.  
581 In addition, the  $R_{\beta\gamma}$  ratio in IB-LW shows an incremental pattern of this ratio from low to high

582 frequencies, which is compatible with an increase of nonsynonymous beneficial variants on their  
 583 way to fixation in LW.

584

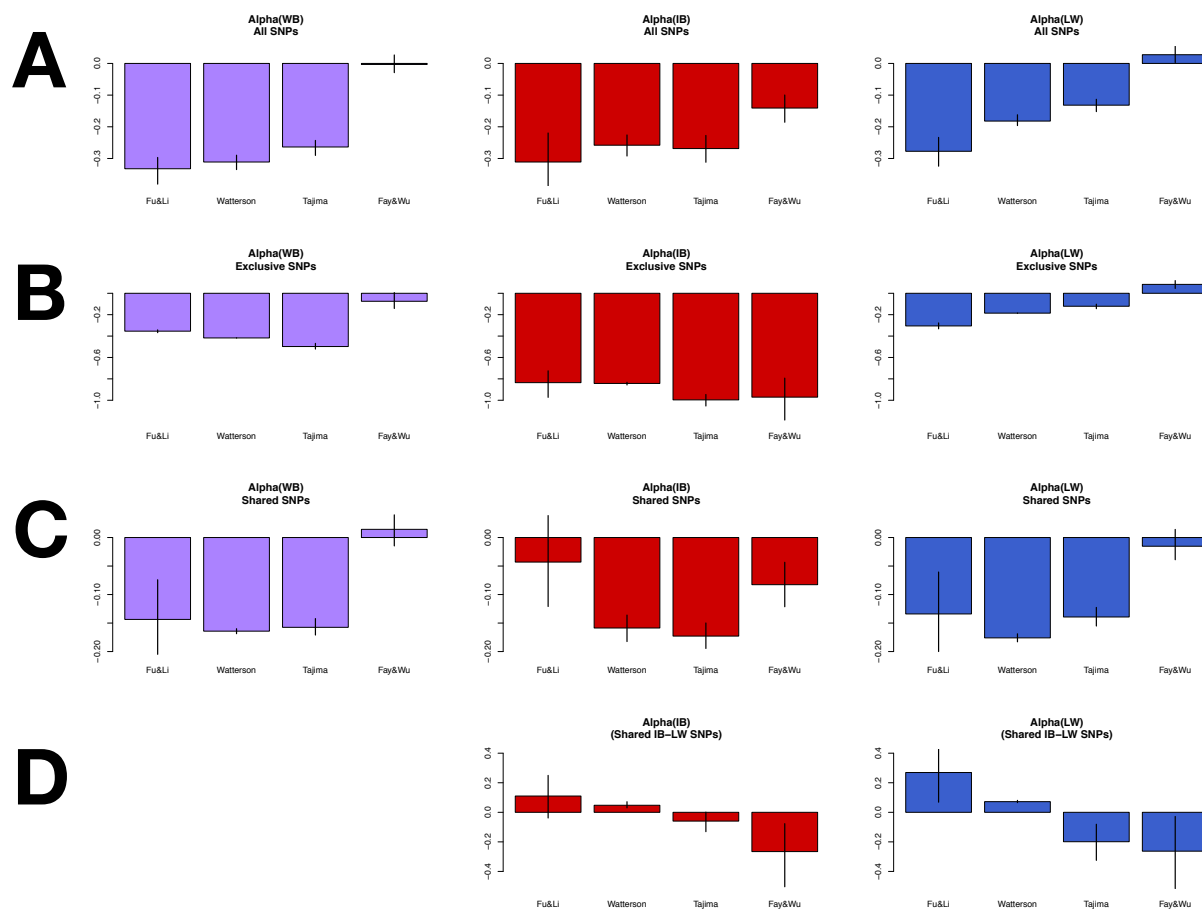

585

586 **Figure 2.** Estimates of  $\alpha$  for each pig population based on different variability estimators. Total variants (A), exclusive  
 587 variants (B), shared variants (C) and shared variants between IB and LW (D). Bootstrap intervals at 95% are indicated  
 588 by a line at each bar. WB; Wild boar; IB, Iberian; LW, Large White.

589

590  **$\alpha$ 's and  $R_{\beta\gamma}$  ratios based on exclusive and shared polymorphisms might reflect changes in**  
 591 **selective patterns before and after domestication**

592 We observed a high ratio of nonsynonymous to synonymous singletons ( $\alpha_{Fu\&Li}$ , Figure 2B) when  
 593 the analysis was performed based on exclusive polymorphisms, suggesting that they have  
 594 deleterious effects in all populations. Nevertheless, the values of  $\alpha$  calculated based on



595 intermediate frequency variants ( $\alpha_{Tajima}$ ) in the WB and IB populations are lower than to those  
596 based on low-frequency variants, which point to a change in the selective pressure, maintaining  
597 nonsynonymous variants at relatively high frequencies. Nevertheless, the  $\alpha_{Fay\&Wu}$  values (-0.075,  
598 -0.971 and 0.083 for WB, IB and LW, respectively, Table S9) show a similar trend in relation to  
599 that based of Total SNPs, that is, close to 0 or positive for WB and LW, but strongly negative for  
600 IB. Concordant estimates are observed in the analysis of the SFS based on a reduced number of  
601 SNPs (0.155, -0.913 and 0.277 for WB, IB and LW, respectively, Figure 6B), with the difference  
602 that a clear positive and not 0  $\alpha$  values is observed in WB. The  $R_{\beta\gamma}$  statistic shows the same  
603 pattern as that calculated using all SNPs but with all over one (Figure 3). That indicates that WB  
604 has a higher proportion of nonsynonymous polymorphisms compared to IB, in contrast to what is  
605 observed when the analysis is performed based on all SNPs. This would suggest a recent change  
606 in the constraint of nonsynonymous positions likely at IB breed, as this ratio in IB-LW is also  
607 affected. This is also in agreement with the low  $\alpha$  value in IB breed at exclusive variants regarding  
608 to Total SNPs.

609  
610 On the other hand, the  $\alpha$  values based on shared variants are in general more moderate (closer to  
611 zero) than those based on exclusive variants (Figure 2C), likely because shared nonsynonymous  
612 polymorphisms are older and hence, expected to be more functionally constrained than the  
613 exclusive ones. Additionally, the values of  $\alpha$  based on singletons ( $\alpha_{Fu\&Li}$ ) are less negative than  
614 those based on intermediate-frequency variants. The  $\alpha$  estimates based on shared variants in the  
615 analysis of the reduced subset of SNPs are very similar to Total SNPs and very close to zero (Figure  
616 6C). The  $R_{\beta\gamma}$  statistic for shared variants shows similar patterns than those observed for all  
617 variants but with values much closer to 1, indicating a small or moderate selective effect on the  
618 shared variants compared to all variants (Figure 3).

619  
620 When we calculated the  $\alpha$  values from shared variants only between the two domestic breeds, we  
621 found an inverse pattern regarding to that calculated from all SNPs in each population, with high  
622 positive values of  $\alpha$  based on low frequencies and very negative values when  $\alpha$  is calculated based  
623 on high-frequency variants (Figure 2D). This could be due to i) the active elimination of new  
624 nonsynonymous variants to preserve differences among domestic breeds ( $\alpha_{Fu\&Li}$ ) and ii) the

625 presence of nonsynonymous variants targeted by the process of domestication that shifts them  
626 toward high frequencies ( $\alpha_{\text{Fay\&wu}}$ ). Nevertheless, we cannot discard that this excess of  
627 nonsynonymous variants at high frequencies and the lack of nonsynonymous singletons at low  
628 frequency could be due to a more complex and not previously explored demographic scenario.  
629

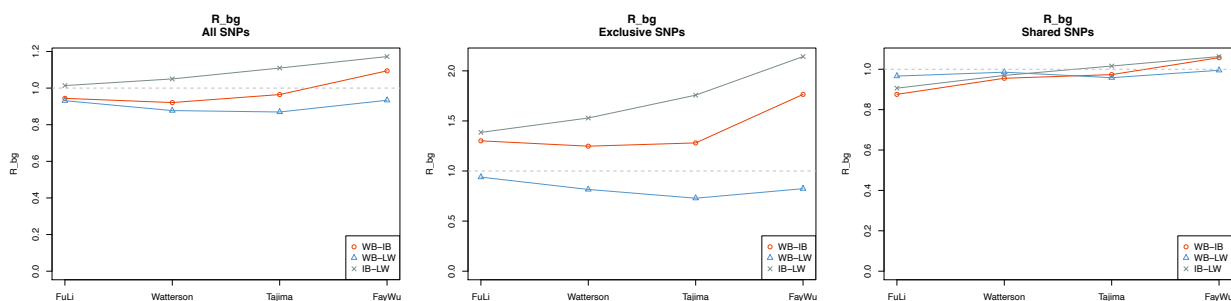

630  
631 **Figure 3.** Estimates of  $R_{\beta\gamma}$  for all (left), exclusive (centre) and shared (right) variants. WB; Wild boar; IB, Iberian;  
632 LW, Large White.

633  
634 **Values of  $\alpha$  are dependent of the molecular scale but the patterns of the estimated  $\alpha$ 's are**  
635 **similar across the different molecular scales**

636 In addition to the genome-wide analysis,  $\alpha$  was calculated using three additional molecular scale  
637 levels: i) gene level, ii) genes within windows of 5 Mb, and iii) genes within the same pathway.  
638 Figure 4 shows the median of the distributions of the  $\alpha$  values for each scale level. When the  
639 analysis was performed based on all SNPs, the pattern of  $\alpha$  values estimated at the genome-wide  
640 level are concordant with those estimated at the gene level, genes within windows and genes within  
641 pathways for each breed. However, differences in the value of  $\alpha$  within each breed are notorious  
642 depending on the scale level examined. The median estimates of  $\alpha$  are generally lower at the gene  
643 scale level and most of them are very negative, while at the genome-wide scale, the  $\alpha$  values are  
644 closer to zero. However, the distribution of  $\alpha$  values can have a large variance at the gene scale  
645 since few variants are used for its estimation. We identified the regions and pathways that showed  
646 extreme  $\alpha$  values (Table S10 and S11). We found a large number of genes showing  $\alpha = 1$  (highest  
647 value) because the number of polymorphic nonsynonymous variants per gene was zero. We also  
648 found a moderately high correlation of  $\alpha$  values between breeds ( $\rho \sim 0.7$ , Pearson correlation

649 when considering pathways) suggesting that in general, these breeds are under similar selective  
650 effects. When considering shared and exclusive variants, we generally observed the same pattern,  
651 from genes to whole-genome, that is, larger  $\alpha$  values at the gene level and closer to zero  $\alpha$  values  
652 at the larger scale. The differences in  $\alpha$  values could be explained because of the distribution of  
653 this ratio statistic (*i.e.*, skewed distribution to negative values) and the uneven distribution of the  
654 functional variants, in which the mean can be displaced to more negative values (see Materials and  
655 Methods).

656

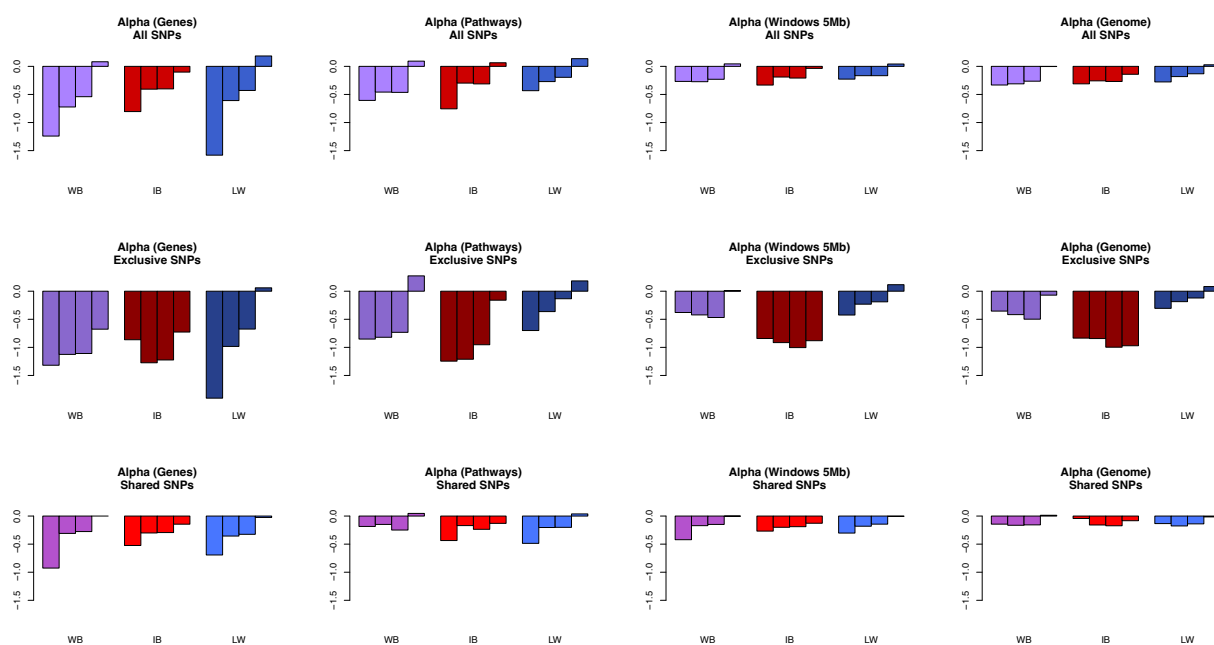

657  
658 **Figure 4.** Estimates of the median values of  $\alpha$  based on different variability estimators and for each pig population at  
659 different molecular scales and for all, exclusive and shared variants. Within each population, the order of different  $\alpha$ 's  
660 is: Fu&Li, Watterson, Tajima and Fay&Wu. WB; wild boar; IB, Iberian; LW, Large White.

661  
662 **Simulated data under different scenarios that include the joint effect of demography and**  
663 **selective events were more concordant to the observed data**

664 We used computer simulations to study how the different demographic and selective events  
665 occurred during domestication process shaped nucleotide variation present in these populations.  
666 We simulated populations mimicking the process of domestication using *SLiM* software (Haller  
667 and Messer 2017), coupled with several demographic events, including changes of the population

668 size and/or migration. We analyzed the genome-wide patterns of  $\alpha$  and the  $R_{\beta\gamma}$  statistic produced  
669 by 63 simulated scenarios that included different demographic events and selective forces acting  
670 separately (simple scenarios) or jointly (complex scenarios). The results of the simulation study  
671 are summarized in Figures S7-S48. The observed patterns of  $\alpha$  based on all variants in the surveyed  
672 populations are not compatible with simple scenarios that only consider demographic or positive  
673 selection forces (Figure S7). Rather,  $\alpha$  patterns from simulated data (irrespective of the magnitude  
674 of  $\alpha$ ) fit a scenario with a predominant effect of negative selection (Figure S7). However, the  $R_{\beta\gamma}$   
675 statistic do not fit any of the simulated simple scenarios (Figure S8). When more complex scenarios  
676 were considered (i.e., including a bottleneck, positive/negative selection and/or migration, Figures  
677 S9-S14), the general  $\alpha$  patterns generated by those scenarios that include both negative and positive  
678 selection resembled those observed in WB and LW (with negative  $\alpha$ 's at low frequency values to  
679 slightly positive  $\alpha$  values at high frequency). The scenarios that also include some migration events  
680 are the ones that showed more concordance for these two breeds (Figures S12, S14). On the other  
681 hand, the IB population is more compatible with a scenario without positive selection and with a  
682 recent population size reduction (Figure S13). The trends in the  $R_{\beta\gamma}$  statistic are, in broad strokes,  
683 concordant with the conclusions extracted from the comparison between the observed and  
684 simulated patterns of  $\alpha$  (Figures S15-S20).

685  
686 The observed patterns of  $\alpha$  values based on exclusive variants are similar to those based on total  
687 variants but only for the LW population (Figure S21). These patterns cannot be fully explained by  
688 any of the complex simulated scenarios that are concordant when considering all variants, although  
689 surprisingly, they would be more compatible with those including a population size reduction  
690 (Figures S24-S28). The observed  $R_{\beta\gamma}$ 's are compatible with the scenarios that combine both types  
691 of selection and a population size reduction (WB-IB) or with scenarios that include migration  
692 (WB-LW; Figures S29-S34). Finally, the observed patterns of  $\alpha$  and  $R_{\beta\gamma}$  statistics calculated from  
693 shared variants are also compatible with scenarios which includes both types of selection (Figures  
694 S35-S48), and being quite compatible with those including expansion demographic events.  
695 Overall, the simulations data showed that complex scenarios, including demography, migration,  
696 and positive and negative selection, may be necessary to explain the observed data.

697

698

699 **Table 2.** Posterior Probabilities for each ABC model (multinomial logistic method with tolerance 0.01)  
700 and for each pig population for Total variants, Exclusive variants, and Shared variants.

**Posterior probabilities for model comparison (multinomial logistic method)**

| <b>TOTAL</b>     | <b>modelA</b> | <b>modelC</b> | <b>modelDN</b> | <b>modelD</b> |
|------------------|---------------|---------------|----------------|---------------|
| <b>WB</b>        | 0.000         | 0.039         | 0.623          | 0.338         |
| <b>IB</b>        | 0.000         | 0.031         | 0.968          | 0.001         |
| <b>LW</b>        | 0.000         | 0.195         | 0.526          | 0.279         |
| <b>EXCLUSIVE</b> | <b>modelA</b> | <b>modelC</b> | <b>modelDN</b> | <b>modelD</b> |
| <b>WB</b>        | 0.007         | 0.011         | 0.512          | 0.470         |
| <b>IB</b>        | 0.004         | 0.001         | 0.995          | 0.000         |
| <b>LW</b>        | 0.001         | 0.111         | 0.113          | 0.775         |
| <b>SHARED</b>    | <b>modelA</b> | <b>modelC</b> | <b>modelDN</b> | <b>modelD</b> |
| <b>WB</b>        | 0.001         | 0.334         | 0.405          | 0.260         |
| <b>IB</b>        | 0.000         | 0.413         | 0.576          | 0.011         |
| <b>LW</b>        | 0.001         | 0.447         | 0.462          | 0.090         |

701

702 **Models that assume a discrete distribution of beneficial and deleterious mutations would fit**  
703 **better the observed data**

704 We used an approximate Bayesian computation (ABC) analysis to infer the DFE separately for  
705 each population using the ratios of nonsynonymous to synonymous variants (i.e., polymorphism  
706 and divergence) obtained from the whole-genome analysis (see Materials and Methods). Four  
707 different models implemented in *polyDFE2* software (Tataru et al. 2019) were tested. These  
708 models overcome the inference of the demographic parameters (and others such as linkage effects)  
709 by the inclusion of nuisance parameters (see Material and Methods). The four models were: model  
710 A, which assumes a gamma distribution of deleterious mutations; model C, which assumes a  
711 gamma distribution for deleterious mutations and an exponential distribution for beneficial  
712 mutations; model DN, that assumes a discrete distribution of only deleterious and neutral  
713 mutations, and model D, that assumes a discrete distribution of deleterious, neutral and beneficial,  
714 mutations. Goodness of fit (GoF) analysis revealed that the simulated data under the different  
715 models fits differentially to the observed data, although the used range of parameters for priors are  
716 compatible with the observed data for all the four models (Table S12). Posterior probabilities  
717 showed that the DN is the most likely model for all three populations when using total number of

718 variants (Table 2). The posterior probability for this model is especially high for the IB breed  
719 (0.97). Nevertheless, note that the model D is just below the DN model by less than half of the  
720 probability in the case of WB and LW. Finally, the posterior predictive analysis indicated that the  
721 observed  $\alpha$  values for the three populations are within the range determined by the minimum and  
722 maximum simulated  $\alpha$  values (i.e.,  $Q1-1.5*IQR$ ,  $Q3+1.5*IQR$ , respectively, being IQR the  
723 Interquartile Range  $Q3-Q1$ ) under both models DN and D, although not always inside the Q1 and  
724 Q3 quantiles (Figure 5). The mean parameters of the DFE inferred for each population are shown  
725 in Table 3 (see also Table S13). The obtained results indicated that the DFE is quite similar among  
726 all three populations, which is not entirely surprising because they share a long-term history.  
727 According to model DN, and despite there is a lot of uncertainty in the inferred estimates (Table  
728 S13), the obtained results show that the DFE contains a large fraction of very deleterious variants,  
729 with approximately 75% of the variants being strongly deleterious ( $S = -2000$ ), and with  
730 approximately 12% of the variants being neutral or slightly deleterious (approx. 4%). The model  
731 D infers a higher proportion of weak deleterious mutations compared to the neutral ones, although  
732 the sum of both is similar to model DN. Finally, the inferred contribution of positive selection is  
733 relatively low (around 0.7-1.1%).

734

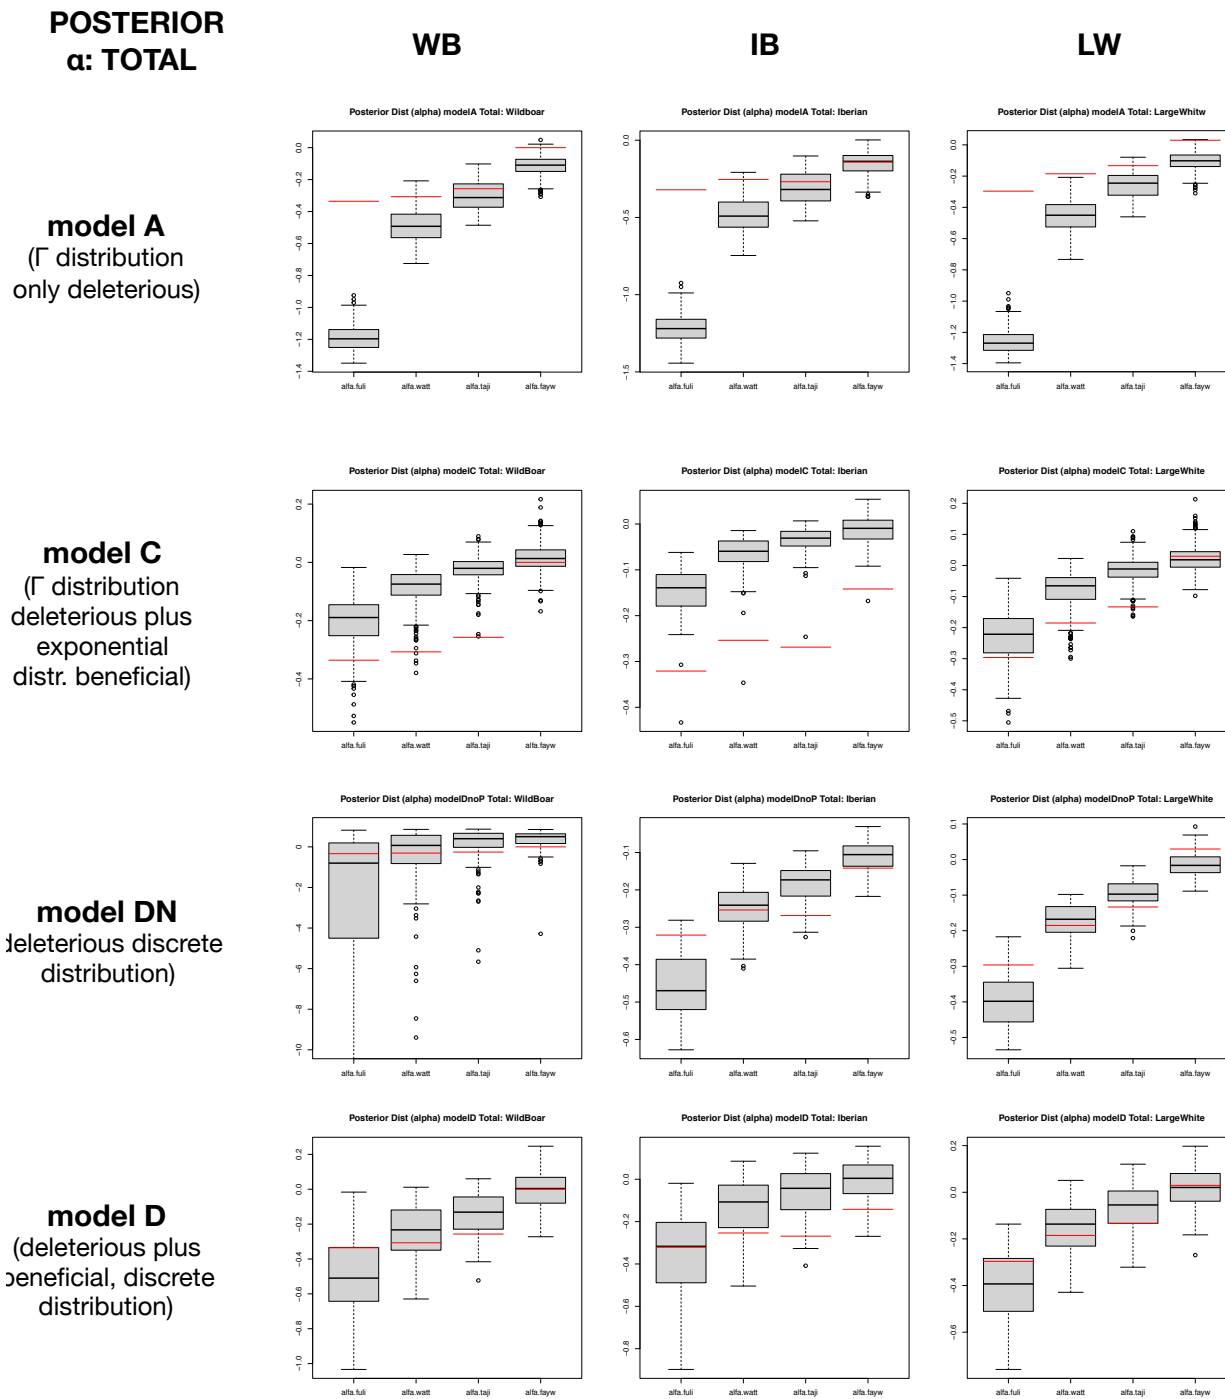

735

736 **Figure 5.** Posterior distributions of the  $\alpha$  values for total variants based on different variability estimators (Fu&Li,  
737 Watterson, Tajima and Fay&Wu). Box plots indicate simulated distributions of  $\alpha$  values. Red lines indicate observed  
738  $\alpha$  values.

739

740 **The differential patterns of DFE based on exclusive versus shared variants may indicate**  
741 **selective differences after the split of the populations**

742 We are aware that the inference of the SFS is going to be highly distorted by choosing only a  
743 subsection of the variants (e.g., exclusive variants are mostly very recent and have no time to reach  
744 high frequencies and shared variants show no or few singletons per populations). However, the  
745 nuisance parameters incorporated in polyDFE should account for this effect (Tataru et al. 2017).  
746 The classification of polymorphisms in exclusive or shared are dependent of the relationship  
747 between two populations, and are a priori not related to the selective effect of these polymorphisms  
748 across their frequencies, although shared (mostly older) and exclusive (mostly recent) variants are  
749 chronologically related to the selection of variants. Then, we considered that the inference of DFE  
750 from exclusive and shared polymorphisms can give some clues about recent and past events related  
751 to the domestication processes. The models with higher posterior probabilities in the case of WB  
752 and IB breeds based on exclusive variants are the same than those for total variants (Table 2).  
753 However, for LW and based on exclusive variants, the model D has higher posterior probabilities,  
754 in contrast to what was obtained based on total variants (Table 2). The posterior predictive  
755 simulations showed that the models DN and D yielded similar estimated  $a$  values to those from  
756 the observed data, with the IB breed exhibiting the posterior distributions of  $a$  values more distant  
757 to the observed data (Figure 6). The estimates of the parameters of the models indicate that, for all  
758 populations, the exclusive segregating variants exhibit less strongly deleterious effects compared  
759 to those based on total and shared variants (Table 3). Indeed, the IB breed shows significantly  
760 lower proportions of strong deleterious mutations, according to its assumed recent population  
761 decline. As in the analysis based on total variants, posterior predictive analysis based on exclusive  
762 variants showed that models DN and D are those generating  $a$  values more similar to the observed  
763 ones, but in this case, the observed  $a$  values for the IB breed were slightly closer to the simulated  
764  $a$ 's, compared to those based on total variants (Figure 6). The results obtained based on shared  
765 variants also show that the DN is the most likely model for all populations, although the model C  
766 shows closer probabilities (Table 2), especially in the case of LW, which might suggest that shared  
767 variants may have played a significant role as a substrate for adaptive process. However, posterior  
768 predictive distribution of  $a$  values for this breed under this model resembled less the observed data  
769 compared to those for the most likely models (Figure 7).



**POSTERIOR  
 $\alpha$ : EXCLUSIVE**

**model A**  
( $\Gamma$  distribution  
only deleterious)

**model C**  
( $\Gamma$  distribution  
deleterious plus  
exponential  
distr. beneficial)

**model DN**  
(deleterious  
discrete  
distribution)

**model D**  
(deleterious plus  
beneficial,  
discrete  
distribution)

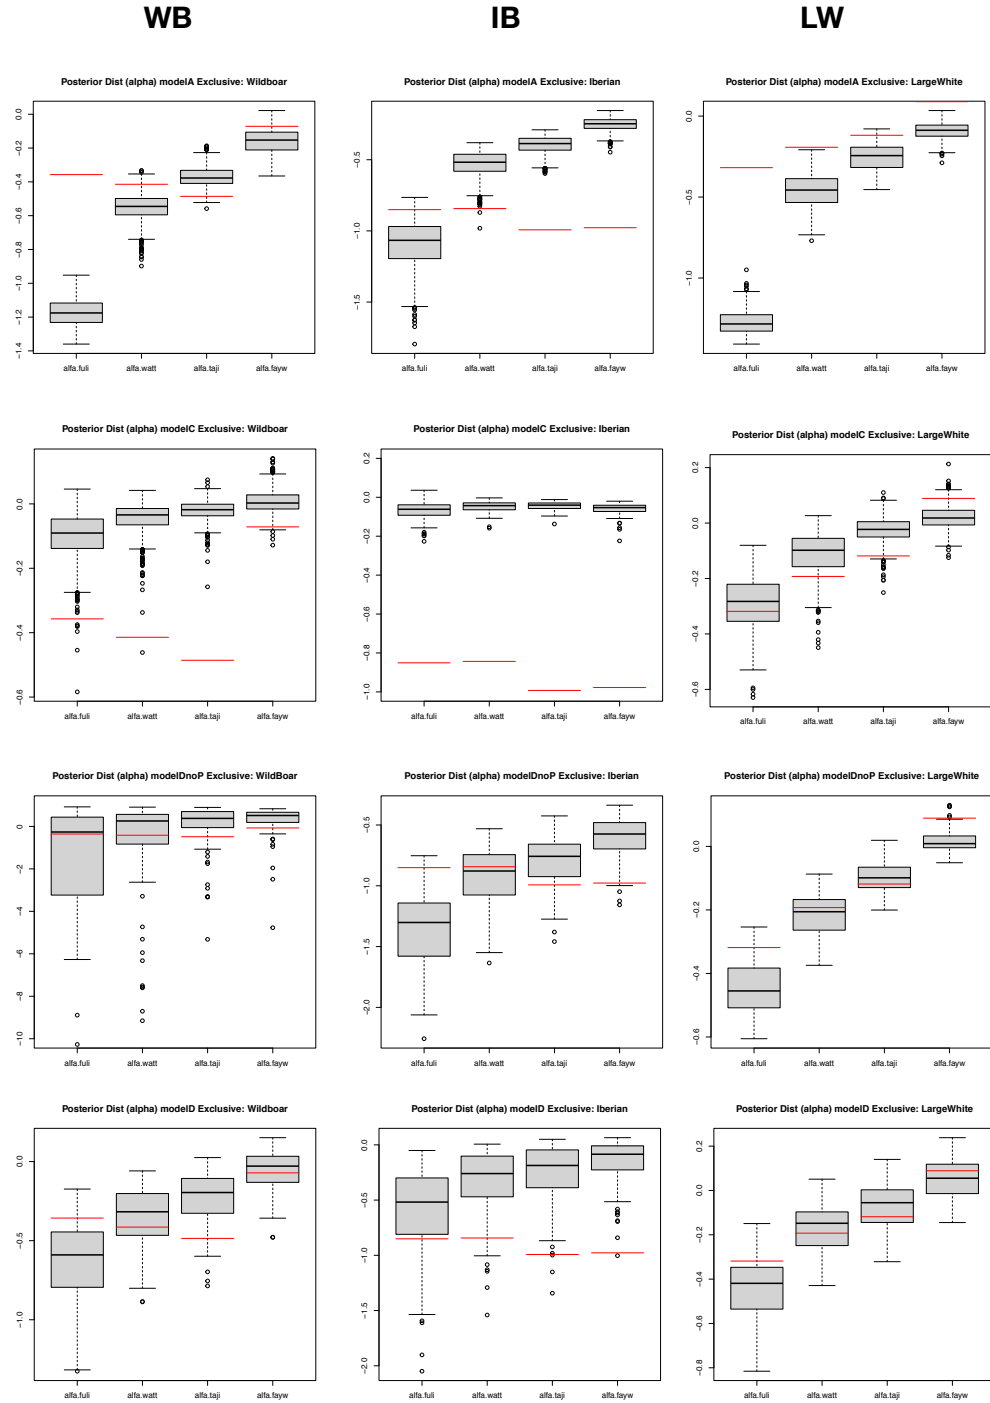

770

771 **Figure 6.** Posterior distribution of the  $\alpha$  values for exclusive variants based on different variability estimators (Fu&Li,  
772 Watterson, Tajima and Fay&Wu). Box plots indicate the simulated distributions of  $\alpha$  values. Red lines indicate  
773 observed  $\alpha$  values.

774

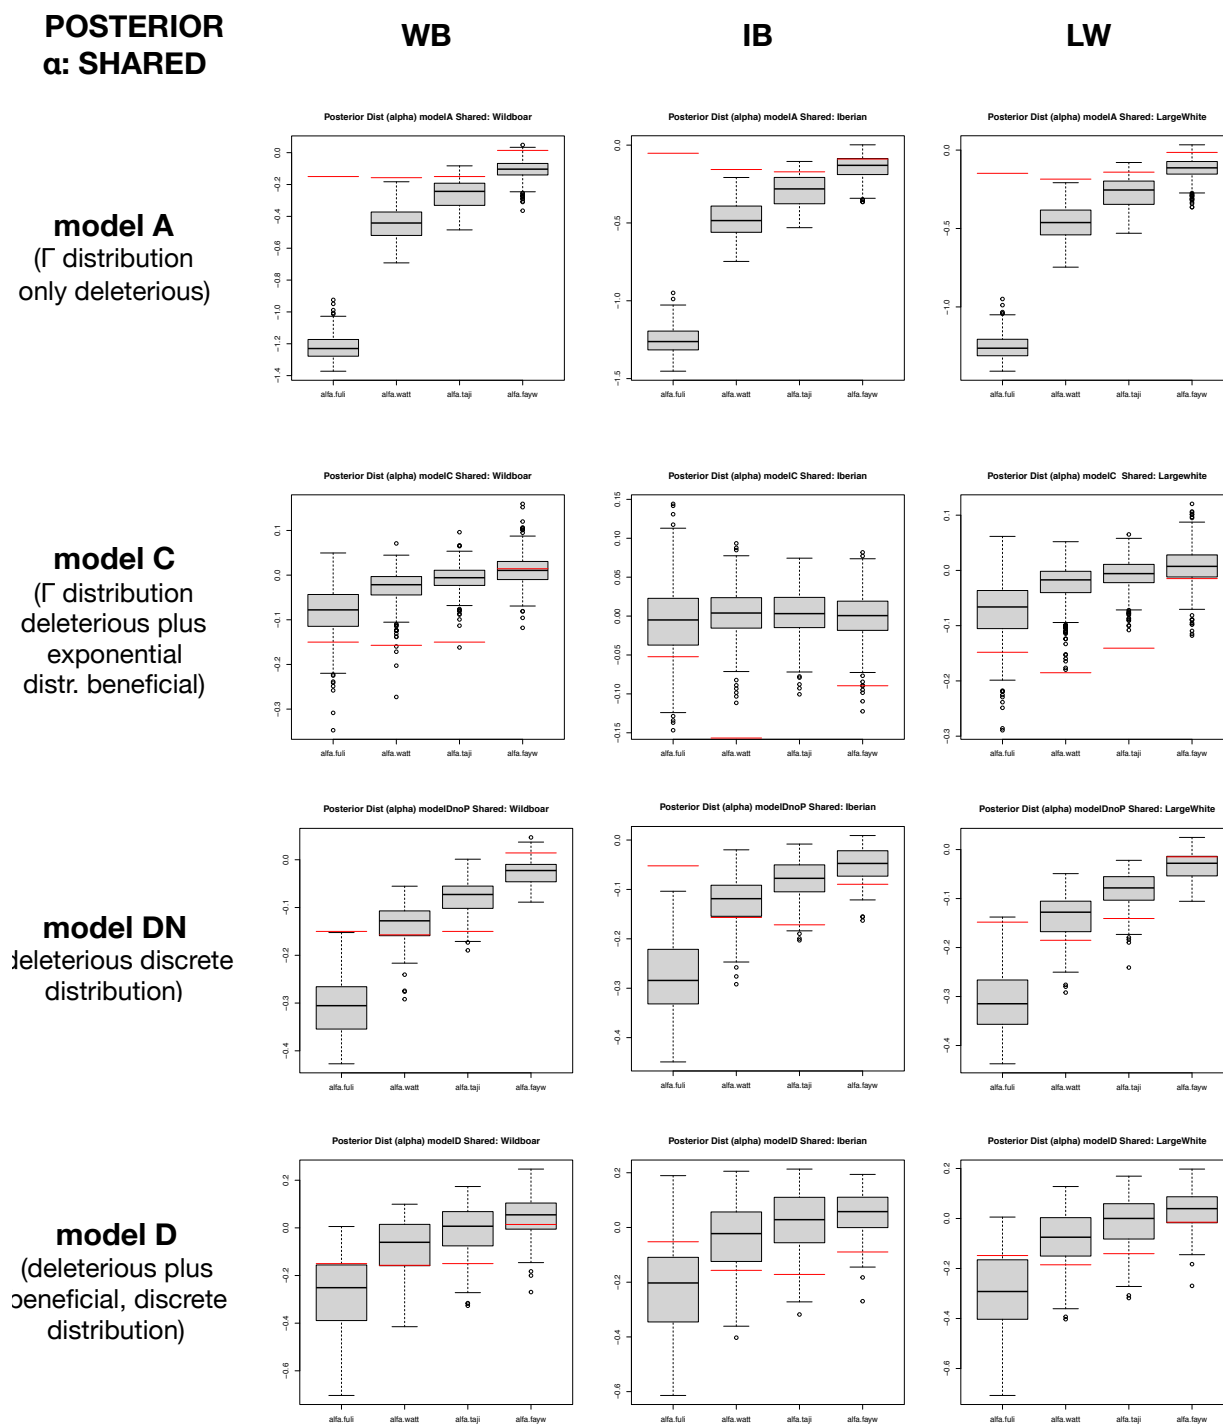

775

776 **Figure 7.** Posterior distribution of the  $\alpha$  values for shared variants based on different variability estimators (Fu&Li,  
777 Watterson, Tajima and Fay&Wu). Box plots indicate the simulated distributions of  $\alpha$  values. Red lines indicate  
778 observed  $\alpha$  values. .

779

780 **Table 3.** Inferred selective parameters (weighted mean) for each ABC model and pig population. (A) Total variants. (B) Exclusive polymorphisms. (C) Shared  
781 polymorphisms. Note that for model DN and D, the proportion of each discrete S value is relative to the total S values, considering negative inferred values as zero.

Table 3. Mean Inference of parameters for each of the four analyzed models

| Mean      | model A  |       | model C |        |       |       | model DN     |             |            |           |          | model D      |             |            |           |          |          |           |
|-----------|----------|-------|---------|--------|-------|-------|--------------|-------------|------------|-----------|----------|--------------|-------------|------------|-----------|----------|----------|-----------|
| TOTAL     | Sd       | b     | Sd      | b      | pb    | Sb    | p1 (S=-2000) | p2 (S=-200) | p3 (S=-20) | p4 (S=-2) | p5 (S=0) | p1 (S=-2000) | p2 (S=-200) | p3 (S=-20) | p4 (S=-2) | p5 (S=0) | p6 (S=2) | p7 (S=20) |
| WB        | 24634.19 | 0.179 | 4724.54 | 2.514  | 0.145 | 0.009 | 0.736        | 0.070       | 0.024      | 0.045     | 0.125    | 0.741        | 0.057       | 0.023      | 0.098     | 0.074    | 0.006    | 0.001     |
| IB        | 27016.47 | 0.180 | 6625.76 | 3.064  | 0.144 | 0.011 | 0.767        | 0.049       | 0.016      | 0.045     | 0.123    | 0.757        | 0.057       | 0.018      | 0.061     | 0.098    | 0.008    | 0.001     |
| LW        | 20351.15 | 0.189 | 6563.28 | 1.940  | 0.137 | 0.017 | 0.772        | 0.058       | 0.019      | 0.027     | 0.125    | 0.771        | 0.050       | 0.019      | 0.076     | 0.073    | 0.010    | 0.001     |
| Mean      | model A  |       | model C |        |       |       | model DN     |             |            |           |          | model D      |             |            |           |          |          |           |
| EXCLUSIVE | Sd       | b     | Sd      | b      | pb    | Sb    | p1 (S=-2000) | p2 (S=-200) | p3 (S=-20) | p4 (S=-2) | p5 (S=0) | p1 (S=-2000) | p2 (S=-200) | p3 (S=-20) | p4 (S=-2) | p5 (S=0) | p6 (S=2) | p7 (S=20) |
| WB        | 33447.89 | 0.170 | 3694.78 | 0.821  | 0.153 | 0.002 | 0.723        | 0.055       | 0.018      | 0.091     | 0.113    | 0.709        | 0.064       | 0.020      | 0.135     | 0.065    | 0.006    | 0.001     |
| IB        | 1834.41  | 0.216 | 253.88  | 44.58  | 0.151 | 0.038 | 0.584        | 0.091       | 0.027      | 0.223     | 0.074    | 0.599        | 0.101       | 0.028      | 0.142     | 0.119    | 0.009    | 0.001     |
| LW        | 22064.47 | 0.187 | 8311.62 | 1.046  | 0.133 | 0.027 | 0.751        | 0.077       | 0.025      | 0.025     | 0.123    | 0.762        | 0.058       | 0.020      | 0.091     | 0.058    | 0.010    | 0.001     |
| Mean      | model A  |       | model C |        |       |       | model DN     |             |            |           |          | model D      |             |            |           |          |          |           |
| SHARED    | Sd       | b     | Sd      | b      | pb    | Sb    | p1 (S=-2000) | p2 (S=-200) | p3 (S=-20) | p4 (S=-2) | p5 (S=0) | p1 (S=-2000) | p2 (S=-200) | p3 (S=-20) | p4 (S=-2) | p5 (S=0) | p6 (S=2) | p7 (S=20) |
| WB        | 25128.11 | 0.182 | 5223.06 | 5.852  | 0.146 | 0.016 | 0.790        | 0.042       | 0.013      | 0.021     | 0.133    | 0.773        | 0.052       | 0.017      | 0.061     | 0.085    | 0.012    | 0.001     |
| IB        | 29540.82 | 0.182 | 9042.17 | 11.758 | 0.147 | 0.005 | 0.804        | 0.035       | 0.010      | 0.020     | 0.131    | 0.783        | 0.051       | 0.016      | 0.045     | 0.089    | 0.014    | 0.001     |
| LW        | 24929.43 | 0.185 | 5169.65 | 5.573  | 0.137 | 0.020 | 0.798        | 0.038       | 0.014      | 0.022     | 0.129    | 0.777        | 0.052       | 0.017      | 0.059     | 0.084    | 0.011    | 0.001     |

782

783 Sd: 4Ns mean value for mutations with negative effects. b: shape of the gamma distribution for mutations with negative effect. pb: proportion of beneficial  
784 mutations. Sb: 4Ns mean value for mutations with positive effects. p1 (S=-2000): proportion of functional variants having 4Ns=-2000, p2 (S=-200): proportion of  
785 functional variants having 4Ns=-200, p3 (S=-20): proportion of functional variants having 4Ns=-20, p4 (S=-2): proportion of functional variants having 4Ns=-2,  
786 p5 (S=0): proportion of functional variants having 4Ns=0 (neutral), p6 (S=+2): proportion of functional variants having 4Ns=+2, p7 (S=+20): proportion of  
787 functional variants having 4Ns=+20. Nuisance parameters are not shown.

788

## 789 **DISCUSSION**

790 The study of the genetic effects produced by domestication can be challenged for many reasons.  
791 First, the current domesticated species have been severely manipulated by humans, which means  
792 that most of individuals were not crossed randomly, and consequently, different complex  
793 domestication scenarios can be found such as a high degree of structuration, a fast creation of new  
794 lineages from highly inbreeding crosses, a forced introgression between far related populations or  
795 from close species and a very divergent selective events across time and space, among others (e.g.,  
796 Mignon-Grasteau et al. 2005, Ross-Ibarra et al. 2007, Ramos-Onsins et al. 2014, Gaut et al. 2018).  
797 Moreover, in animals, the polygenic nature of the domestication traits often precludes identifying  
798 their underlying genes since the domestic phenotypes might be probably caused by subtle allele-  
799 frequency changes of variants distributed throughout the genome, and hence, very difficult to be  
800 detect. In addition, the study of the effects of selection using genome sequences that contain a  
801 nonnegligible fraction of missing data, such as those from non-model organisms, is challenging  
802 and needs the use of appropriate methods to account for these positions. Statistics that exploit the  
803 frequency of the variants while accounting for missing data are particularly appropriate for such  
804 analyses (Ferretti, Raineri, and Ramos-Onsins 2012). Despite all this inconvenience, domestic  
805 populations are an excellent model to study the effect of strong and recent selection (e.g., Doebley,  
806 Gaut and Smith 2006, Groenen 2016).

807

808 One of the main goals of this work is to provide a novel approach that combines the use of different  
809 estimators of variability that account for missing data with the asymptotic approach proposed by  
810 Messer and Petrov (2013) and Uricchio et al. (2019) in order to take into account some of these  
811 issues. This approach is designed to be used as an alternative in case of the estimation of the full  
812 SFS is compromised by large amounts of missing data. Although it can be less precise (we used  
813 only four statistics to capture the entire trend of  $\alpha$ 's across the SFS), it allows analyzing a larger  
814 number of positions, helps to reduce the variance (by summarizing the SFS into few statistics) and  
815 facilitates the visual interpretation. To illustrate the utility of the proposed approach, we used this  
816 methodology to perform an exhaustive comparative study of the observed patterns of functional  
817 versus neutral diversity and divergence in domestic pigs and wild boars. In addition, and to delve  
818 deeper into the domestication process of this species, we also performed a forward simulation

819 study, including several diverse evolutionary scenarios and the inference of DFE parameters given  
820 different selective models. Note that the DFE was inferred using Bayesian calculations (ABC)  
821 instead of exact Bayesian or Likelihood methods since despite ABC requires additional steps and  
822 validation analysis and is in general less precise, it allows contrasting models and inferring  
823 parameters from complex datasets or data containing missing information (Beaumont et al. 2002).  
824 Finally, we have also analysed exclusive and shared polymorphisms separately to extract  
825 information about the new and the past domestication events of the demographic history of these  
826 populations, but also about the role of population admixture.

827

### 828 **General selection pressures on pigs and the process of domestication**

829 Like us, others have been already performed several analyses to shed light on the process of  
830 domestication using the MacDonald and Kreitman extension methods or using other estimates  
831 such as variability or divergence at functional or synonymous positions (MacEachern et al. 2009,  
832 Kono et al. 2016, Makino et al. 2018). As in Makino et al. (2018), we do not observe an increase  
833 in functional diversity in domestic versus wild populations. This may be explained by several  
834 recent events occurring in these populations: (i) differences in the recent history our local and  
835 commercial domesticated populations (i.e., high inbreeding degree in Iberian local pigs and recent  
836 gene flow from Asian pigs into the commercial pigs); (ii) demographic effects in the wild boar  
837 population that may have reduced their diversity (Groenen et al 2016) or have increased the  
838 confidence intervals of the patterns of  $\alpha$ 's (Figures S5-S46); (iii) differential adaptive forces in  
839 local (IB) versus commercial pigs (LW), with a recent high selective pressure in this last  
840 population.

841 Accordingly, with their recent history, the IB breed shows the lowest levels of synonymous and  
842 nonsynonymous variation among the breeds studied. Note that the two domestic breeds analyzed  
843 here have very different recent histories: the IB is a local Spanish breed (Guadyrvas) that suffered  
844 a strong bottleneck during the 1970s (Esteve-Codina et al. 2013) and with no evidence of  
845 introgression whereas the LW breed was admixed with pigs of Asian origin (Bosse, Megens,  
846 Madsen, et al. 2014). Therefore, our observations are perfectly compatible with the small effective  
847 population size and the close relatedness of the individuals expected for this population. However,  
848 for the other two breeds, the obtained results do not seem to conform to what was expected. since

849 we detected very similar levels of variability between LW and WB, even though we expected to  
850 find higher levels of variation in the first due to the documented introgression of Asian germplasm  
851 into LW (approximately 20–35% of the genome has been estimated to be of Asian origin; Groenen  
852 et al. 2012, Bosse et al. 2012, Bosse, Megens, Madsen, et al. 2014, Frantz et al. 2015, Bianco et  
853 al. 2015, Ai et al. 2015). Interestingly, the high levels of variability were observed for variants that  
854 belonged to different frequency ranges in these two populations: singletons in WB and in high-  
855 frequency derived alleles in LW. Although these differences may be mainly due to the effects of  
856 gene flow in LW, we cannot discard an important effect of the selective programs applied to this  
857 commercial breed.

858

### 859 **Domestication hallmarks at pig coding regions**

860 Another main goal of this work was finding the hallmarks of positive selection produced as a  
861 consequence of the domestication since this process implies a process of positive (human  
862 mediated) selection for traits that benefit both humans and the species of interest. The paucity of  
863 fixed variants found at coding positions in the three breeds indicates that the observed heritable  
864 phenotypic differences among the breeds are either due to: i) very few selective sweeps, ii) positive  
865 selection at noncoding functional regions that were not analyzed in here, iii) changes in the  
866 frequencies of nonsynonymous variants without being fixed. If the first hypothesis is true, we  
867 expect that domestication process should fix the adaptive variants for those genes underlying the  
868 phenotypes of interest. However, we found no fixed variants between domestic breeds and wild  
869 pigs. Although this might be a consequence of some genetic exchange among populations, we  
870 found that the individuals were classified in groups by their location and according to their  
871 respective phenotype (Figure S3A), which suggest that the domestication features of the different  
872 breeds, even if admixed, are maintained. When we checked the  $\alpha$  values for those genes that were  
873 previously reported to show signals of positive selection using other approaches (Groenen 2016),  
874 we found that these genes show little or no nonsynonymous polymorphisms or fixed variants  
875 (Table S14). This absence of variability is typical from regions under selective sweeps, although  
876 not necessarily implicating that these genes are the targets of domestication since there are no  
877 variants fixed or close to fixation at their coding regions. We only found significant values of  $\alpha$   
878 over zero at the gene *KIT* in the IB breed, the genes *IGF2R* and *JMJD1C* in the LW breed and the

879 gene LRRTM3 in the WB population. This low number of genes with positive  $\alpha$  values would  
880 make the first hypothesis unlikely. The second hypothesis implies that the functional regions  
881 implicated in domestication would be out of coding regions (promoters, enhancers, and others.  
882 (e.g., Li et al 2018, Rubin et al 2012, Anderson 2012). However, although being a promising  
883 hypothesis, we did not analyze those regions because it requires a very accurate analysis of  
884 homology and their associated functionality, which is very complicated at the genome level,  
885 especially for non-model species with a high proportion of missing data. The third hypothesis  
886 suggests that the domesticated phenotype is caused by a moderate change in the frequency of a  
887 relatively large number of variants with small selective effects. In this case, depending on the size  
888 of the selective effect there would only be changes in the frequencies of the variants without  
889 reaching fixation. In the last case, the functional variants involved in domestication should be  
890 segregating in the analyzed populations. These positively selected variants segregating at high  
891 frequencies, together with the presence of deleterious mutations also segregating at low  
892 frequencies, would be reflected as an excess of non-neutral polymorphism compared to divergence  
893 (*i.e.*, negative  $\alpha$  statistic at high frequencies). Hence, in cases where there is a significant  
894 proportion of positive selection variants that have not yet being fixed, we expect to observe a trend  
895 in the  $\alpha$  slope showing more negative  $\alpha$  values at intermediate-high frequencies. However, we did  
896 not observe this pattern in any of the three populations examined when the analysis was performed  
897 based on all coding positions, although it was observed for  $\alpha$  values estimated based on exclusive  
898 and shared mutations, which suggest that different types of variants (total, shared and exclusive)  
899 could be capturing different aspects of the domestication process (demography versus selection).

900 The estimation of the DFE from the ABC analysis showed that the most likely evolutionary model  
901 for all three populations based on total variants was that consisting in a discrete DFE without  
902 significant positive selection effect (model DN; Table 2), showing a clear genome-wide effect of  
903 the action of purifying selection. We also observed a reduced effect of purifying selection in IB  
904 and in less extend in WB when the analysis was performed based on exclusive variants, which  
905 suggest a reduction of the population size of these two populations. However, for LW and when  
906 the analysis was performed based on exclusive positions, the most likely model was that with a  
907 discrete distribution that includes the effect of positive selection (model D; Table 2), which may  
908 reflect the increase of new Asian variants which increased in frequency by artificial selection..  
909 Nevertheless, the differences between models including or excluding beneficial variants were

910 relatively small, suggesting that, in general, a few proportion of beneficial mutations contributed  
911 to the domestication process. In fact, under model D, the estimated global proportion of beneficial  
912 mutations (weak and strong) was relatively small and slightly higher when the analysis is based  
913 on shared variants (0.1% based on total and exclusive SNPs and 1.4% based on shared SNPs;  
914 Table 3) and similar in wild and domestic populations. Nevertheless, this proportion of mutations  
915 may be substantial in absolute numbers (*i.e.*, several thousand mutations).

916 Although an excess of nonsynonymous shared variants compared to the synonymous ones can be  
917 explained by some demographic scenarios such as bottlenecks, they may also reflect biological  
918 constraints at the species level. For instance, the phenotypic variation in a polygenic selective  
919 scenario could be caused by subtle changes in the frequencies of many genes (in an infinitesimal  
920 scenario) which would result in the observed phenotypic differences among the breeds. On the  
921 other hand, exclusive variants may reflect recent and breed-specific selective hallmarks and hence,  
922 would be responsible for the observed differences between domesticated and wild breeds. In both  
923 cases, shared and exclusive polymorphisms are contributing to the differences in the SFS between  
924 functional and non-functional positions. Nevertheless, the differences of the DFE when the  
925 analysis was performed based on total or shared variants is very small, suggesting that exclusive  
926 variants would be more informative to detect the effects of the change of selective effects.

927 In addition, our simulated domestication scenarios indicate that the effect of positive selection  
928 irrespective of being either strong and affecting a small percentage of variants or weak and  
929 affecting a large percentage of variants is not reflected as marked changes in the estimated patterns  
930 of  $\alpha$ . This could be due to the short time since the change in the fitness effects of variants occurred  
931 but also by the interaction of positive and negative selection and demographic processes in the  
932 case of the complex scenarios, which are the most compatible with the observed data. In fact, the  
933 observed  $\alpha$  patterns are compatible with the simulated demographic effects (population size  
934 reduction in WB and IB and gene flow in LW) but also, as in the ABC analysis results, with the  
935 effect of positive selection in LW when the analysis was based on exclusive variants.

936 We are aware that the evolutionary models used here are very simple and contain few parameters  
937 and the real observations contain high heterogeneity that could not be fitted to these models. The  
938 reasons for this heterogeneity may be technical (e.g., not adequate filtering of raw sequences),  
939 conceptual (undetected correlations that distort model assumptions) or biological (too simplistic



940 models to explain the real data). In any case, the model that assumes a discrete distribution of  
941 deleterious mutations (model DN) seems to generally explain better the observed data, together  
942 with the model D (model DN but including the effect of beneficial selection) in a minor degree  
943 and also that exclusive variants seemed to be more informative to detect the changes of the  
944 selective effects.

945

## 946 **Final remarks**

947 The observed patterns of variability are compatible with the presence of deleterious mutations  
948 segregating in all three breeds but also with weak signals of positive selection. In addition, when  
949 the variants are split into shared and exclusive, we observed patterns that are in line with the  
950 simulated data under different demographic scenarios with the joint action of positive and negative  
951 selection. We found a clear effect of deleterious mutations at low-frequency variants and a possible  
952 mild effect of positive selection at higher frequencies. However, additional analyses contrasting  
953 evolutionary models that consider the effects of standing variation, whose effect change under the  
954 domestication process, may shed more light and will help to understand the patterns of variation  
955 shaped by the domestication process.

956

## 957 **ACKNOWLEDGMENTS**

958 We acknowledge L. Silió and M. C. Rodríguez for helpful comments on the manuscript. S.E.R.O.  
959 is supported by grants AGL2016-78709-R (MEC, Spain) and PID2020-119255GB-I00 (MICINN,  
960 Spain), by the CERCA Programme/Generalitat de Catalunya and acknowledges financial support  
961 from the Spanish Ministry of Economy and Competitiveness, through the Severo Ochoa  
962 Programme for Centres of Excellence in R&D 2016-2019 and 2020-2023 (SEV-2015-0533,  
963 CEX2019-000917) and the European Regional Development Fund (ERDF). S.G-R. was supported  
964 by a Beatriu de Pinós postdoctoral fellowship (AGAUR; 2014 BP-B 00027).

965

## 966 **CONFLICT OF INTEREST DISCLOSURE**

967 The authors of this article declare that they have no financial conflict of interest with the content  
968 of this article. Sebastian E. Ramos-Onsins is one of the PCIEvolBiol recommenders.

969

## 970 LITERATURE CITED

971 Achaz G. 2009. "Frequency Spectrum Neutrality Tests: One for All and All for One." *Genetics*  
972 183: 249–58. <https://doi.org/10.1534/genetics.109.104042>.

973 Ai H., Fang X., Yang B., Huang Z, Chen H, Mao L, et al. 215 "Adaptation and possible ancient  
974 interspecies introgression in pigs identified by whole- genome sequencing." *Nat Genet.*  
975 2015;47:217–25.

976 Akashi H. 1995. "Inferring weak selection from patterns of polymorphism and divergence at  
977 "silent" sites in *Drosophila* DNA". *Genetics* 139(2):1067–1076.

978 Alexander D.H., Novembre J. and Lange K. (2009) Fast model-based estimation of ancestry in  
979 unrelated individuals. *Genome Research*, 19:1655–1664.

980 Alvarez-Ponce D., and Fares M. A. 2012. "Evolutionary Rate and Duplicability in the  
981 *Arabidopsis Thaliana* Protein-Protein Interaction Network." *Genome Biology and Evolution*  
982 4 (12): 1263–74. <https://doi.org/10.1093/gbe/evs101>.

983 Alves E., Ovilo C., Rodríguez C., and Silió L. 2003. "Mitochondrial DNA sequence variation  
984 and phylogenetic relationships among Iberian pigs and other domestic and wild pig  
985 populations." *Animal Genetics* 34:319-324.

986 Alves E., Fernández A. I., Barragán C., Ovilo C., Rodríguez C., and Silió L.. 2006. "Inference of  
987 Hidden Population Substructure of the Iberian Pig Breed Using Multilocus Microsatellite  
988 Data." *Spanish Journal of Agricultural Research* 4 (1): 37–46.  
989 [http://www.inia.es/gcontrec/pub/alves-fernandez-barragan-...\\_1141287881015.pdf](http://www.inia.es/gcontrec/pub/alves-fernandez-barragan-..._1141287881015.pdf).

990 Amaral A.J., Ferretti L., Megens H.J., Crooijmans R.P.M.A., Ni H, Ramos-Onsins S.E., Perez-  
991 Enciso M., Schook L.B., Groenen M.A.M.. 2011 "Genome-wide footprints of pig  
992 domestication and selection revealed through massive parallel sequencing of pooled DNA."  
993 *PLoS One*. 2011;6(4):e14782. doi:10.1371/journal.pone.0014782

994 Andersson L. 2012 "How selective sweeps in domestic animals provide new insight into

- 995 biological mechanisms." *J Intern Med.* 2012;271:1–14.
- 996 Andersson L. 2013 "Molecular consequences of animal breeding." *Curr Opin Genet Dev.*  
997 23(3):295-301. doi: 10.1016/j.gde.2013.02.014.
- 998 Beaumont M.A., Zhang W., Balding D.J. Approximate Bayesian computation in population  
999 genetics. *Genetics.* 2002;162(4):2025-2035.
- 1000 Bianco E., Nevado B., Ramos-Onsins S. E., and Pérez-Enciso M. 2015. "A Deep Catalog of  
1001 Autosomal Single Nucleotide Variation in the Pig." *PLoS ONE* 10 (3): 1–21.  
1002 <https://doi.org/10.1371/journal.pone.0118867>.
- 1003 Booker T.R, and Keightley P.D.. 2018. "Understanding the Factors That Shape Patterns of  
1004 Nucleotide Diversity in the House Mouse Genome." *Molecular Biology and Evolution* 35  
1005 (12): 2971–88. <https://doi.org/10.1093/molbev/msy188>.
- 1006 Bosse M., Megens H.-J., Frantz L.A.F., Madsen O., Larson G., Paudel Y., Duijvesteijn N. et al.  
1007 2014. "Genomic Analysis Reveals Selection for Asian Genes in European Pigs Following  
1008 Human-Mediated Introgression." *Nature Communications* 5: 4392.  
1009 <https://doi.org/10.1038/ncomms5392>.
- 1010 Bosse M., Megens H.-J., Madsen O., Frantz L.A.F., Paudel Y., Crooijmans R.P.M.A. and  
1011 Groenen M.A.M. 2014. "Untangling the Hybrid Nature of Modern Pig Genomes: A Mosaic  
1012 Derived from Biogeographically Distinct and Highly Divergent *Sus Scrofa* Populations."  
1013 *Molecular Ecology* 23 (16): 4089–4102. <https://doi.org/10.1111/mec.12807>.
- 1014 Bosse M., Megens H.-J., Madsen O., Paudel Y., Frantz L.A.F., Schook L.B, Crooijmans  
1015 R.P.M.A and Groenen M.A.M. 2012. "Regions of Homozygosity in the Porcine Genome:  
1016 Consequence of Demography and the Recombination Landscape." *PLoS Genetics* 8 (11).  
1017 <https://doi.org/10.1371/journal.pgen.1003100>.
- 1018 Chen J., Ni P., Li X., Han J., Jakovlić I., Zhang C., Zhao S. 2018 "Population size may shape the  
1019 accumulation of functional mutations following domestication." *BMC Evolutionary Biology*  
1020 18:4 DOI 10.1186/s12862-018-1120-6
- 1021 Cruz F., Vilà C., and Webster M.T. 2008. "The Legacy of Domestication: Accumulation of  
1022 Deleterious Mutations in the Dog Genome." *Molecular Biology and Evolution* 25 (11):  
1023 2331–36. <https://doi.org/10.1093/molbev/msn177>.

- 1024 Csardi G., and Nepusz T. 2006. "The Igraph Software Package for Complex Network Research."  
1025 *InterJournal, Complex Systems* 1695. <http://igraph.org>.
- 1026 Csilléry K., François O. and Blum M.G.B. 2012 " abc: an R package for approximate Bayesian  
1027 computation (ABC) " *Methods in Ecology and Evolution* 2012, 3, 475–479.
- 1028 Doebley J.F., Gaut B.S. and Smith B.D. 2006. "The molecular genetics of crop domestication".  
1029 *Cell*. 29;127(7):1309-21. doi: 10.1016/j.cell.2006.12.006.
- 1030 Duret L, Semon M, Piganeau G, Mouchiroud D and Galtier N. 2002. "Vanishing GC-rich  
1031 isochores in mammalian genomes". *Genetics* 162(4):1837–1847.
- 1032 Esteve-Codina A., Paudel Y., Ferretti L., Raineri E., Megens H.-J., Silió L., Rodríguez M.C.,  
1033 Groenen M.A.M., Ramos-Onsins S.E., and Pérez-Enciso M. 2013. "Dissecting Structural  
1034 and Nucleotide Genome-Wide Variation in Inbred Iberian Pigs." *BMC Genomics* 14 (148):  
1035 1. <https://doi.org/10.1186/1471-2164-14-148>.
- 1036 Evanno G., Regnaut S., Goudet J. 2005. "Detecting the number of clusters of individuals using  
1037 the software STRUCTURE: a simulation study". *Mol Ecol*. 14(8):2611-20.
- 1038 Eyre-Walker A. 2002. "Changing Effective Population Size and the McDonald-Kreitman Test."  
1039 *Genetics* 162: 2017–24. <http://www.genetics.org/content/genetics/162/4/2017.full.pdf>.
- 1040 Eyre-Walker A. 2006 "The genomic rate of adaptive evolution." *Trends Ecol Evol* 21(10):  
1041 569–575.
- 1042 Fang M., Larson G., Ribeiro H.S., Li N., Andersson L. 2011 "Contrasting mode of evolution at a  
1043 coat color locus in wild and domestic pigs." *PLoS Genet*. 5:e1000341.
- 1044 Fay J.C. and Wu C-I. 2000. "Hitchhiking Under Positive Darwinian Selection." *Genetics* 155:  
1045 1405–13. <https://www.ncbi.nlm.nih.gov/pmc/articles/PMC1461156/pdf/10880498.pdf>.
- 1046 Fay J.C., Wyckoff G.J., Wu C.I. 2001 "Positive and negative selection on the human genome."  
1047 *Genetics* 158(3):1227–1234.
- 1048 Ferretti L., Raineri E. and Ramos-Onsins S.E. 2012. "Neutrality Tests for Sequences with  
1049 Missing Data." *Genetics* 191 (4): 1397–1401. <https://doi.org/10.1534/genetics.112.139949>.
- 1050 Fisher, R. A. 1919. "XV.—The Correlation between Relatives on the Supposition of Mendelian

- 1051 Inheritance.” *Transactions of the Royal Society of Edinburgh* 52 (02): 399–433.  
1052 <https://doi.org/10.1017/S0080456800012163>.
- 1053 Frantz L.A.F., Schraiber J.G., Madsen O., Megens H.-J, Bosse M., Paudel Y., Semiadi G. et al.  
1054 2013. “Genome Sequencing Reveals Fine Scale Diversification and Reticulation History  
1055 during Speciation in Sus.” *Genome Biology* 14 (9): R107. [https://doi.org/10.1186/gb-2013-](https://doi.org/10.1186/gb-2013-14-9-r107)  
1056 [14-9-r107](https://doi.org/10.1186/gb-2013-14-9-r107).
- 1057 Frantz L.A.F., Schraiber J.G., Madsen O., Megens H.-J., Cagan A., Bosse M., Paudel Y.,  
1058 Crooijmans R.P.M.A., Larson G., and Groenen M.A.M. 2015. “Evidence of Long-Term  
1059 Gene Flow and Selection during Domestication from Analyses of Eurasian Wild and  
1060 Domestic Pig Genomes.” *Nature Genetics* 47 (10): 1141–48.  
1061 <https://doi.org/10.1038/ng.3394>.
- 1062 Fraser H. B, Hirsh A.E., Steinmetz L.M., Scharfe C., and Feldman M.W. 2002. “Evolutionary  
1063 Rate in the Protein Interaction Network.” *Science* 296 (5568): 750–52.  
1064 <https://doi.org/10.1126/science.1068696>.
- 1065 Fu Y.-X. and Li W.-H. 1993. "Statistical tests of neutrality of mutations". *Genetics*. 133(3):693-  
1066 709. doi: 10.1093/genetics/133.3.693.
- 1067 Gaut B.S., Seymour D.K., Liu Q., Zhou Y. 2018. "Demography and its effects on genomic  
1068 variation in crop domestication". *Nat Plants*. 4(8):512-520. doi: 10.1038/s41477-018-0210-  
1069 1.
- 1070 Groenen M.A.M. 2016. “A Decade of Pig Genome Sequencing: A Window on Pig  
1071 Domestication and Evolution.” *Genetics, Selection, Evolution : GSE Sel Evol* 48 (23): 1–9.  
1072 <https://doi.org/10.1186/s12711-016-0204-2>.
- 1073 Groenen, M.A.M., Alan L. Archibald, Hirohide Uenishi, Cristopher K. Tuggle, Yasuhiro  
1074 Takeuchi, Max F. Rothschild, Claire Rogel-Gaillard, et al. 2012. “Analyses of Pig Genomes  
1075 Provide Insight into Porcine Demography and Evolution.” *Nature* 491 (7424): 393–98.  
1076 <https://doi.org/10.1038/nature11622>.
- 1077 Guirao-Rico S., Ramirez O., Ojeda A., Amills M., and Ramos-Onsins S.E.. 2018. “Porcine Y-  
1078 Chromosome Variation Is Consistent with the Occurrence of Paternal Gene Flow from Non-  
1079 Asian to Asian Populations.” *Heredity* 120 (1): 63–76. <https://doi.org/10.1038/s41437-017->

- 1080 0002-9.
- 1081 Hahn M.W. and Kern A.D.. 2005. "Comparative Genomics of Centrality and Essentiality in  
1082 Three Eukaryotic Protein-Interaction Networks." *Molecular Biology and Evolution* 22 (4):  
1083 803–6. <https://doi.org/10.1093/molbev/msi072>.
- 1084 Haller B. C., and Messer P.W. 2017. "AsymptoticMK: A web-based tool for the asymptotic  
1085 McDonald–Kreitman test". *G3: Genes, Genomes, Genetics* 7(5), 1569–1575. <https://doi:10.1534/g3.117.039693>.
- 1086
- 1087 Haller B.C. and Messer P.W. 2017. "SLiM 2: Flexible, Interactive Forward Genetic  
1088 Simulations." *Molecular Biology and Evolution* 34 (1): 230–40.  
1089 <https://doi.org/10.1093/molbev/msw211>.
- 1090 Hill, W.G. and Robertson A. 1966. "The Effect of Linkage on Limits to Artificial Selection."  
1091 *Genetical Research* 8 (3): 269–94. <http://www.ncbi.nlm.nih.gov/pubmed/5980116>.
- 1092 Kanehisa M., Araki M., Goto S., Hattori M., Hirakawa M., Itoh M., Katayama T. et al. 2008.  
1093 "KEGG for Linking Genomes to Life and the Environment." *Nucleic Acids Research* 36  
1094 (SUPPL. 1): 480–84. <https://doi.org/10.1093/nar/gkm882>.
- 1095 Kim H., Song K.D., Kim H.J., Park W., Kim J., Lee T. et al. 2015 "Exploring the genetic  
1096 signature of body size in Yucatan miniature pig." *PLoS One*. 10:e0121732.
- 1097 Kono T.J.Y., Fu F., Mohammadi M., Hoffman P.J., Liu C., Stupar R.M., Smith K.P., Tiffin P.,  
1098 Fay J.C., Morrell P.L. 2016 "The Role of Deleterious Substitutions in Crop Genomes." *Mol.*  
1099 *Biol. Evol.* 33(9):2307–2317. <https://doi:10.1093/molbev/msw102>
- 1100 Leno-Colorado J., Hudson N.J., Reverter A., and Pérez-Enciso M.. 2017. "A Pathway-Centered  
1101 Analysis of Pig Domestication and Breeding in Eurasia." *G3* 7 (7): 2171–84.  
1102 <https://doi.org/10.1534/g3.117.042671>.
- 1103 Li C., Zou C., Cui Y., Fu Y., Fang C., Li Y., Li J., Wang W., Xiang H., Li C. 2018 "Genome-  
1104 wide epigenetic landscape of pig lincRNAs and their evolution during porcine  
1105 domestication." *Epigenomics*. 2018 Dec;10(12):1603-1618. doi: 10.2217/epi-2017-0117.
- 1106 Li H., and Durbin R. 2009. "Fast and Accurate Short Read Alignment with Burrows-Wheeler  
1107 Transform." *Journal Article. Bioinformatics* 25 (14): 1754–60.

- 1108 <https://doi.org/10.1093/bioinformatics/btp324>.
- 1109 Li H., Handsaker B., Wysoker A., Fennell T., Ruan J., Homer N., Marth G., Abecasis G.R.,  
1110 Durbin R. and Subgroup Genome Project Data Processing. 2009. "The Sequence  
1111 Alignment/Map Format and SAMtools." Journal Article. *Bioinformatics* 25 (16): 2078–79.  
1112 <https://doi.org/10.1093/bioinformatics/btp352>.
- 1113 Li M., Tian S., Jin L., Zhou G., Li Y., Zhang Y., Wang T. et al. 2013. "Genomic Analyses  
1114 Identify Distinct Patterns of Selection in Domesticated Pigs and Tibetan Wild Boars."  
1115 *Nature Genetics* 45 (12): 1431–38. <https://doi.org/10.1038/ng.2811>.
- 1116 Li M., Tian S., Yeung C.K., Meng X., Tang Q., Niu L., Wang X., Jin L., Ma J., Long K., Zhou  
1117 C., Cao Y., Zhu L., Bai L., Tang G., Gu Y., Jiang A., Li X., Li R. 2014 "Whole-genome  
1118 sequencing of Berkshire (European native pig) provides insights into its origin and  
1119 domestication." *Sci Rep*. 4:4678. doi: 10.1038/srep04678.
- 1120 Livingstone K. and Anderson S.. 2009. "Patterns of Variation in the Evolution of Carotenoid  
1121 Biosynthetic Pathway Enzymes of Higher Plants." *Journal of Heredity* 100 (6): 754–61.  
1122 <https://doi.org/10.1093/jhered/esp026>.
- 1123 MacEachern S., McEwan J., McCulloch A., Mather A., Savin K., Goddard M. 2009 "Molecular  
1124 evolution of the Bovini tribe (Bovidae, Bovinae): is there evidence of rapid evolution or  
1125 reduced selective constraint in Domestic cattle?" *BMC Genomics* (10) 179; <https://doi.org/10.1186/1471-2164-10-179>.
- 1127 Matsumoto T., John A., Baeza-Centurion P., Li B., Akashi H. 2016. "Codon Usage Selection  
1128 Can Bias Estimation of the Fraction of Adaptive Amino Acid Fixations". *Mol Biol Evol*.  
1129 2016 Jun;33(6):1580-9. doi: 10.1093/molbev/msw027.
- 1130 Makino T., Rubin C.J., Carneiro M., Axelsson E., Andersson L., Webster M.T. 2018 "Elevated  
1131 Proportions of Deleterious Genetic Variation in Domestic Animals and Plants." *Genome  
1132 Biol Evol*. 10(1):276-290. <https://doi.org/10.1093/gbe/evy004>.
- 1133 McDonald J.H. and Kreitman M.. 1991. "Accelerated Protein Evolution at the Adh Locus in  
1134 *Drosophila*." *Nature* 351: 652–54.
- 1135 McKenna A., Hanna M., Banks E., Sivachenko A., Cibulskis K., Kernytsky A., Garimella K. et  
1136 al. 2010. "The Genome Analysis Toolkit: A MapReduce Framework for Analyzing next-

- 1137 Generation DNA Sequencing Data.” *Genome Research* 20 (9): 1297–1303.  
1138 <https://doi.org/10.1101/gr.107524.110>.
- 1139 Messer P.W. and Petrov D.A. 2013. “Frequent Adaptation and the McDonald-Kreitman Test.”  
1140 *Proceedings of the National Academy of Sciences of the United States of America* 110 (21):  
1141 8615–20. <https://doi.org/10.1073/pnas.1220835110>.
- 1142 Mignon-Grasteau S., Boissy A., Bouix J., Faure J.-M., Fisher A.D., Hinch G. N., Jensen P., Le  
1143 Neindre P., Morméde P., Prunet P., Vandeputte M. and Beaumont C. 2005. "Genetics of  
1144 adaptation and domestication in livestock." *Livestock Production Science* 93:3–14.
- 1145 Montanucci L., Laayouni H., Dall’Olio G.M., and Bertranpetit J. 2011. “Molecular Evolution  
1146 and Network-Level Analysis of the N-Glycosylation Metabolic Pathway across Primates.”  
1147 *Molecular Biology and Evolution* 28 (1): 813–23. <https://doi.org/10.1093/molbev/msq259>.
- 1148 Moon S., Kim T.-H., Lee K.-T., Kwak W., Lee T., Lee S.-W., Kim M.-J. et al. 2015. “A  
1149 Genome-Wide Scan for Signatures of Directional Selection in Domesticated Pigs.” *BMC*  
1150 *Genomics* 16 (1): 1–12. <https://doi.org/10.1186/s12864-015-1330-x>.
- 1151 Nevado B., Ramos-Onsins S.E. and Perez-Enciso M. 2014. “Resequencing Studies of Nonmodel  
1152 Organisms Using Closely Related Reference Genomes: Optimal Experimental Designs and  
1153 Bioinformatics Approaches for Population Genomics.” *Molecular Ecology* 23 (7): 1764–79.  
1154 <https://doi.org/10.1111/mec.12693>.
- 1155 Orlando L. and Librado P. 2019 "Origin and Evolution of Deleterious Mutations in Horses."  
1156 *Genes* 10, 649; doi:10.3390/genes10090649
- 1157 Pérez-Enciso M., de los Campos G., Hudson N., Kijas J. and Reverter A. 2017. “The  
1158 ‘Heritability’ of Domestication and Its Functional Partitioning in the Pig.” *Heredity* 118:  
1159 160–68. <https://doi.org/10.1038/hdy.2016.78>.
- 1160 Quinlan A.R. 2014. “BEDTools: The Swiss-Army Tool for Genome Feature Analysis.” *Current*  
1161 *Protocols in Bioinformatics / Editorial Board, Andreas D. Baxeavanis ... [et Al.]* 47  
1162 (January): 11.12.1-11.12.34. <https://doi.org/10.1002/0471250953.bi1112s47>.
- 1163 Ramírez O., Burgos-Paz W., Casas E., Ballester M., Bianco E., Olalde I., Santpere G. et al. 2014.  
1164 “Genome Data from a Sixteenth Century Pig Illuminate Modern Breed Relationships.”  
1165 *Heredity* 114 (2): 175–84. <https://doi.org/10.1038/hdy.2014.81>.



- 1166 Ramos-Onsins S.E., Burgos-Paz W., Manunza A. and Amills M. 2014. "Mining the pig genome  
1167 to investigate the domestication process". *Heredity (Edinb)* 113(6):471-84. doi:  
1168 10.1038/hdy.2014.68.
- 1169 Ramsay H., Rieseberg L.H. and Ritland K. 2009. "The Correlation of Evolutionary Rate with  
1170 Pathway Position in Plant Terpenoid Biosynthesis." *Molecular Biology and Evolution* 26  
1171 (5): 1045–53. <https://doi.org/10.1093/molbev/msp021>.
- 1172 Rausher M.D, Miller R.E., and Tiffin P. 1999. "Patterns of Evolutionary Rate Variation Among  
1173 Genes of the Anthocyanin Biosynthetic Pathway." *Molecular Biology and Evolution* 16 (2):  
1174 266–74.  
1175 [https://watermark.silverchair.com/mbev\\_16\\_02\\_0266.pdf?token=AQECAHi208BE49Ooan9kkhW\\_Ercy7Dm3ZL\\_9Cf3qfKAc485ysgAAAdwwggHYBkgqhkig9w0BBwagggHJMIIBxQIBADCCAb4GCSqGSIb3DQEHATAeBglghkgBZQMEAS4wEQQMB\\_IVBQyX1n-F9I4pAgEQgIIBj8r0BkU\\_bdeIWEuY\\_7bUxMFToA8Yo-26snF\\_yPY](https://watermark.silverchair.com/mbev_16_02_0266.pdf?token=AQECAHi208BE49Ooan9kkhW_Ercy7Dm3ZL_9Cf3qfKAc485ysgAAAdwwggHYBkgqhkig9w0BBwagggHJMIIBxQIBADCCAb4GCSqGSIb3DQEHATAeBglghkgBZQMEAS4wEQQMB_IVBQyX1n-F9I4pAgEQgIIBj8r0BkU_bdeIWEuY_7bUxMFToA8Yo-26snF_yPY).
- 1179 Renault S., and Rieseberg L.H. 2015. "The Accumulation of Deleterious Mutations as a  
1180 Consequence of Domestication and Improvement in Sunflowers and Other Compositae  
1181 Crops." *Molecular Biology and Evolution* 32 (9): 2273–83.  
1182 <https://doi.org/10.1093/molbev/msv106>.
- 1183 Riley R.M., Jin W. and Gibson G.. 2003. "Contrasting Selection Pressures on Components of the  
1184 Ras-Mediated Signal Transduction Pathway in Drosophila." *Molecular Ecology* 12 (5):  
1185 1315–23. <https://doi.org/10.1046/j.1365-294X.2003.01741.x>.
- 1186 Ross-Ibarra J., Morrell P.L. and Gaut B.S. 2007. "Plant domestication, a unique opportunity to  
1187 identify the genetic basis of adaptation". *Proc Natl. Acad. Sci. USA*. 2007 doi:  
1188 10.1073/pnas.0700643104.
- 1189 Rubin C.-J., Megens H.-J., Martinez Barrio A., Maqbool K., Sayyab S., Schwochow D., Wang  
1190 C. et al. 2012. "Strong Signatures of Selection in the Domestic Pig Genome." *Proceedings  
1191 of the National Academy of Sciences of the United States of America* 109 (48): 19529–36.  
1192 <https://doi.org/10.1073/pnas.1217149109>.
- 1193 Tajima F. 1983. "Evolutionary Relationship of DNA Sequences in Finite Populations." *Genetics*  
1194 105: 437–60. <https://www.ncbi.nlm.nih.gov/pmc/articles/PMC1202167/pdf/437.pdf>.

- 1195 Uricchio L.H., Petrov D.A., Enard D. 2019 "Exploiting selection at linked sites to infer the rate  
1196 and strength of adaptation." *Nat Ecol Evol.* 3(6):977-984. doi: 10.1038/s41559-019-0890-6.
- 1197 Watterson, G.A. 1975. "On the Number of Segregating Sites in Genetical Models without  
1198 Recombination." *Theoretical Population Biology* 7 (2): 256–76.  
1199 [https://doi.org/10.1016/0040-5809\(75\)90020-9](https://doi.org/10.1016/0040-5809(75)90020-9).
- 1200 Wilkinson S., Lu Z.H., Megens H.-J., Archibald A.L., Haley C., Jackson I.J., Groenen M.A.,  
1201 Crooijmans R.P., Ogden R., Wiener P. 2013 "Signatures of diversifying selection in  
1202 European pig breeds." *PLoS Genet.* 2013 Apr;9(4):e1003453. doi:  
1203 10.1371/journal.pgen.1003453.
- 1204 Zeder M.A. 2012. "The Domestication of Animals." *Journal of Anthropological Research* 68  
1205 (2): 161–90. <https://doi.org/10.3998/jar.0521004.0068.201>.
- 1206 Zhang M., Yang Q., Ai H., Huang L. 2021. Revisiting the evolutionary history of pigs via de  
1207 novo mutation rate estimation by deep genome sequencing on a three-generation pedigree.  
1208 *bioRxiv*2021. 2003.2029.437103.

1209

1210 **SUPPLEMENTARY MATERIAL**

1211 See Supplementary Material file added to see the Tables (S1-S14) and Figures (S1-S48).
